# Supplementary material for: Allelic effects on uromodulin aggregates drive autosomal dominant tubulointerstitial kidney disease
Source: PubMed Central journal article supplement (PMC10701617; doi:10.15252/emmm.202318242), 2023-10-26
Supplement: EMMM-15-e18242-s008.pdf [file EMMM-15-e18242-s008.pdf]

**Allelic Effects on Uromodulin Aggregates Drive Autosomal Dominant  
Tubulointerstitial Kidney Disease**

**Appendix**

## Table of contents

|                                                                                                                                      |    |
|--------------------------------------------------------------------------------------------------------------------------------------|----|
| Appendix Figure S1: Uromodulin characteristics in the C171Y and R186S mouse models.....                                              | 3  |
| Appendix Figure S2: Early uromodulin processing defects in R186S/+ mice. ....                                                        | 4  |
| Appendix Figure S3: Unfolded protein response in kidneys from <i>Umod</i> KI mice.....                                               | 5  |
| Appendix Figure S4: Lack of apoptosis or caspase activation in <i>Umod</i> KI kidneys.....                                           | 6  |
| Appendix Figure S5: Mutant UMOD degradation relies on mutation-specific mechanisms. ....                                             | 7  |
| Appendix Figure S6: Markers of autophagy induction in <i>Umod</i> KI mouse kidneys.....                                              | 8  |
| Appendix Figure S7: Macrophage infiltration in <i>Umod</i> KI mouse kidneys. ....                                                    | 9  |
| Appendix Figure S8: Characterization of interstitial fibrosis in <i>Umod</i> KI mouse kidneys. ....                                  | 10 |
| Appendix Figure S9: RNA-seq analyses in 1-month-old R186S/+ kidneys. ....                                                            | 12 |
| Appendix Figure S10: Differential expression and affected pathways in 4-month-old <i>Umod</i> KI kidneys. ....                       | 13 |
| Appendix Figure S11: Disease progression signature in <i>Umod</i> KI kidneys.....                                                    | 14 |
| Appendix Figure S12: Distinct UMOD mutations trigger differential ER quality control responses. .                                    | 15 |
| Appendix Figure S13: Proteasomal inhibition induces mutant UMOD accumulation.....                                                    | 17 |
| Appendix Figure S14: Autophagy modulation impacts on mutant UMOD levels. ....                                                        | 19 |
| Appendix Figure S15: Structural modelling of UMOD mutations.....                                                                     | 21 |
| Appendix Figure S16: Uncropped Western blot membranes. ....                                                                          | 22 |
| Appendix Table S1: Clinical characteristics of p. (Arg185Ser) ADTKD-UMOD family.....                                                 | 26 |
| Appendix Table S2: Clinical characteristics of p. (Cys170Tyr) ADTKD-UMOD families. ....                                              | 27 |
| Appendix Table S3: In silico analysis of selected UMOD missense variants. ....                                                       | 28 |
| Appendix Table S4: Clinical and biochemical parameters of <i>Umod</i> <sup>C171Y</sup> mice.....                                     | 29 |
| Appendix Table S5: Clinical and biochemical parameters of <i>Umod</i> <sup>R186S</sup> mice. ....                                    | 30 |
| Appendix Table S6: Clinical and biochemical parameters of <i>Umod</i> <sup>R186S/-</sup> mice.....                                   | 31 |
| Appendix Table S7: Clinical and biological parameters of 4-month <i>Umod</i> KI mice per gender. ....                                | 32 |
| Appendix Table S8: Top 50 DEGs in <i>Umod</i> <sup>R186S/+</sup> kidneys at 1 month.....                                             | 33 |
| Appendix Table S9: Top 50 DEGs in <i>Umod</i> <sup>R186S/+</sup> kidneys at 4 months. ....                                           | 34 |
| Appendix Table S10: Top 50 DEGs in <i>Umod</i> <sup>C171Y/+</sup> kidneys at 4 months. ....                                          | 35 |
| Appendix Table S11: Top 50 DEGs in <i>Umod</i> <sup>R186S/+</sup> compared to <i>Umod</i> <sup>C171Y/+</sup> kidneys at 1 month..... | 36 |
| Appendix Table S12: Top 50 DEGs in <i>Umod</i> <sup>R186S/+</sup> compared to <i>Umod</i> <sup>C171Y/+</sup> at 4 months.....        | 37 |
| Appendix Table S13: List of primary antibodies.....                                                                                  | 38 |
| Appendix Table S14: Primers used for real-time RT-PCR analysis.....                                                                  | 39 |
| Appendix Table S15: RNA-Seq quality and yield.....                                                                                   | 40 |
| Appendix References.....                                                                                                             | 41 |

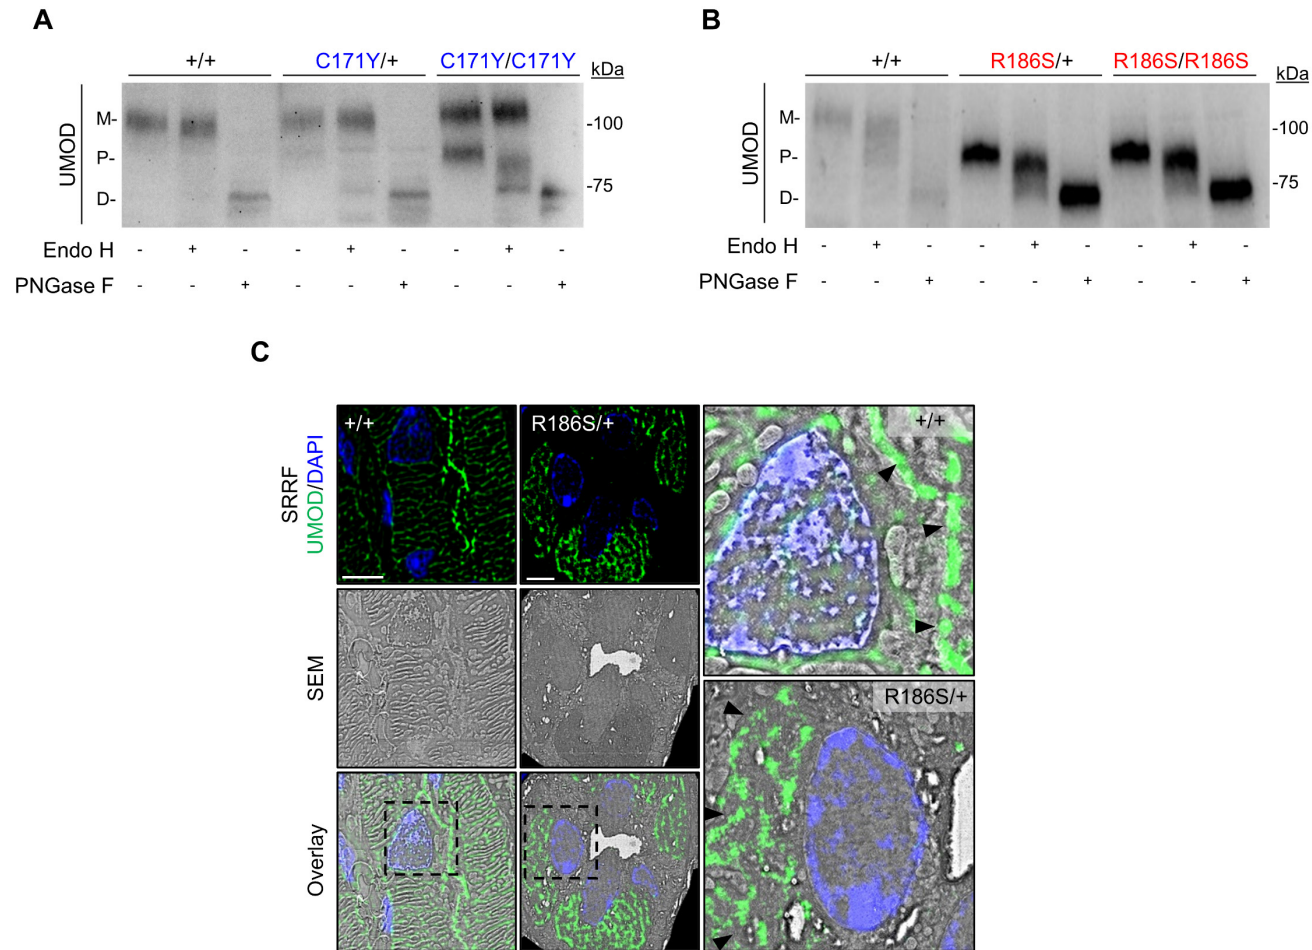

**Appendix Figure S1: Uromodulin characteristics in the C171Y and R186S mouse models.**

(A-B) Immunoblot analysis of UMOD following Endo H or PNGase F treatment in kidneys from 1-month-old C171Y (A) and R186S (B) mice. M: mature; P: precursor; D: deglycosylated. (C) Correlative Light Electron Microscopy (CLEM) of UMOD (green) on kidney sections from 3-month-old +/+ and R186S/+ mice. Nuclei are counterstained with DAPI (blue). Black arrowheads indicate UMOD localization (apical plasma membrane in +/+, endoplasmic reticulum in R186S/+). Scale bar: 5  $\mu$ m. SRRF, super-resolution radial fluctuation; SEM, scanning electron microscopy.

**A**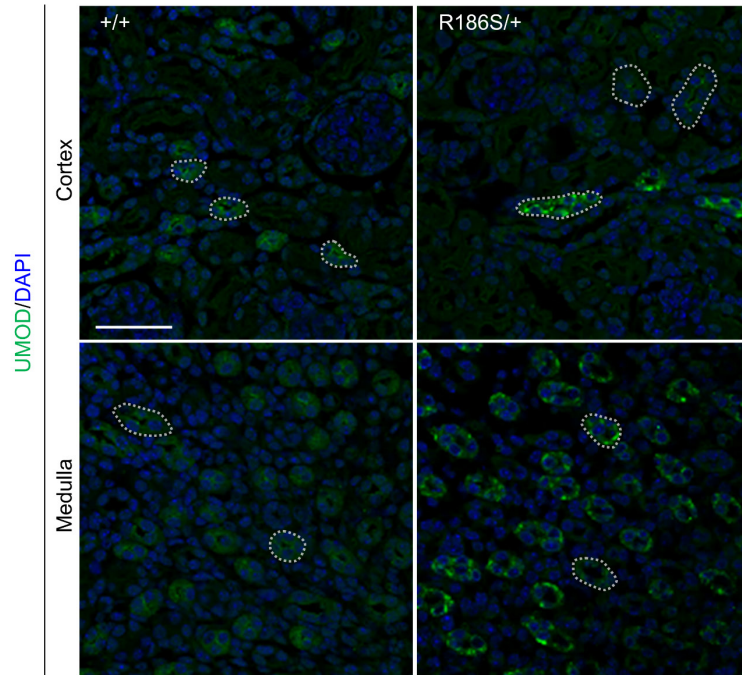**B**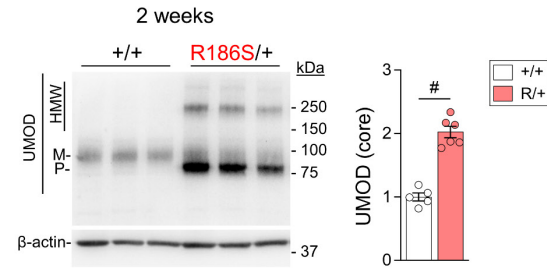**C**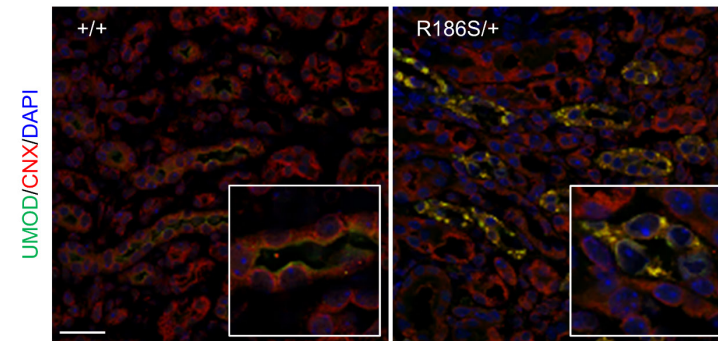

### Appendix Figure S2: Early uromodulin processing defects in R186S/+ mice.

(A) Representative immunofluorescence analysis of UMOD (green) on kidney sections from 2-week-old +/+ and R186S/+ mice. Nuclei counterstained with DAPI (blue). Scale bar: 25  $\mu$ m. Dotted lines identify different tubules with apical or intracellular UMOD accumulation.

(B) Representative immunoblot of UMOD in whole kidney samples from 2-week-old +/+ and R186S/+ mice (n=5 to 6 animals per group).  $\beta$ -actin used as loading control. M: mature UMOD; P: premature UMOD; HMW: high molecular weight. Densitometry analysis relative to +/+. Bars indicate mean  $\pm$  SEM. Unpaired two-tailed t test, # $P$ <0.0001.

(C) Representative immunofluorescence analysis of UMOD (green) and CNX (red) on kidney sections from 2-week-old mice. Nuclei are counterstained with DAPI (blue). Scale bar: 25  $\mu$ m.

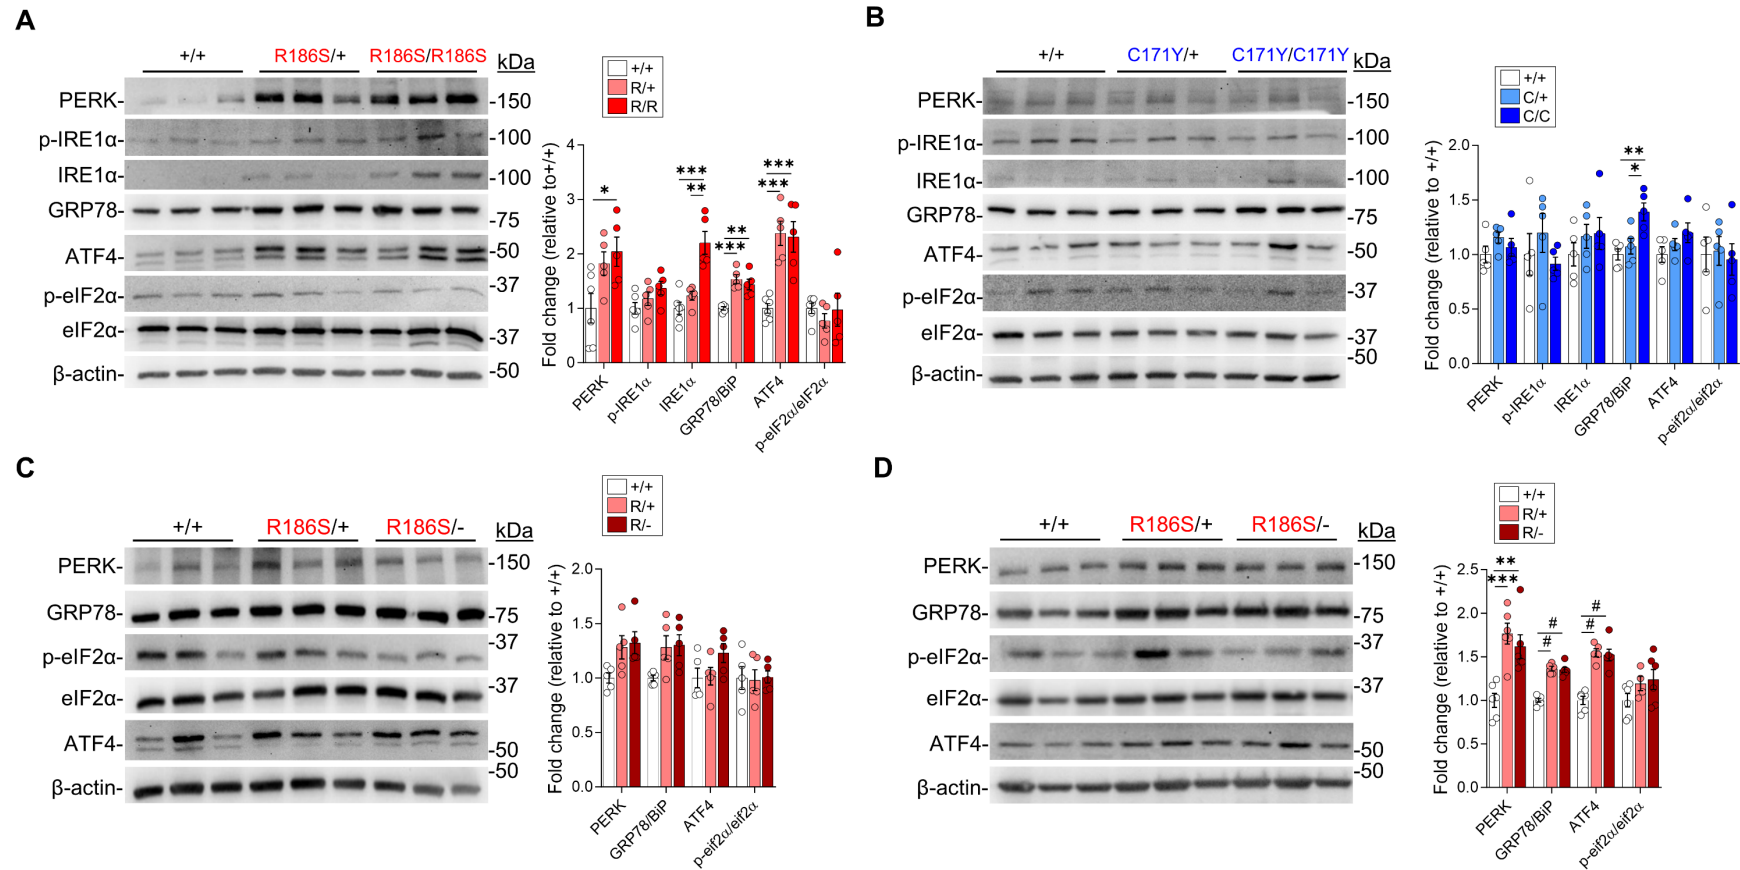

**Appendix Figure S3: Unfolded protein response in kidneys from *Umod* KI mice.**

(A-B) Representative immunoblot analysis of ER stress markers in medulla-enriched kidney fractions from 4-months-old R186S (A) and C171Y (B) mice (n=5 to 6 animals per group). (A) PERK: \* $P=0.0311$ ; IRE1 $\alpha$ : \*\* $P=0.0011$ , \*\*\* $P=0.0001$ ; GRP78/BiP: \*\*\* $P=0.0009$ , \*\* $P=0.0040$ ; ATF4: \*\*\* $P(+/+ \text{ vs. } R/+)=0.0008$ , \*\*\* $P(+/+ \text{ vs. } R/R)=0.0012$ . (B) GRP78/BiP: \* $P=0.019$ , \*\* $P=0.0049$ .

(C-D) Representative immunoblot analysis of ER stress markers in 1-month-old medulla-enriched kidney fractions (C) or 4-months-old total kidney lysates from +/+, R186S/+ and R186S/- mice (n=5 to 6 animals per group).  $\beta$ -actin used as loading control. Densitometry analysis is relative to +/+. (D) PERK: \*\*\* $P=0.0007$ , \*\* $P=0.0045$ ; # $P<0.0001$ .

Bars indicate mean  $\pm$  SEM. One-way ANOVA followed by Tukey's post-hoc test.

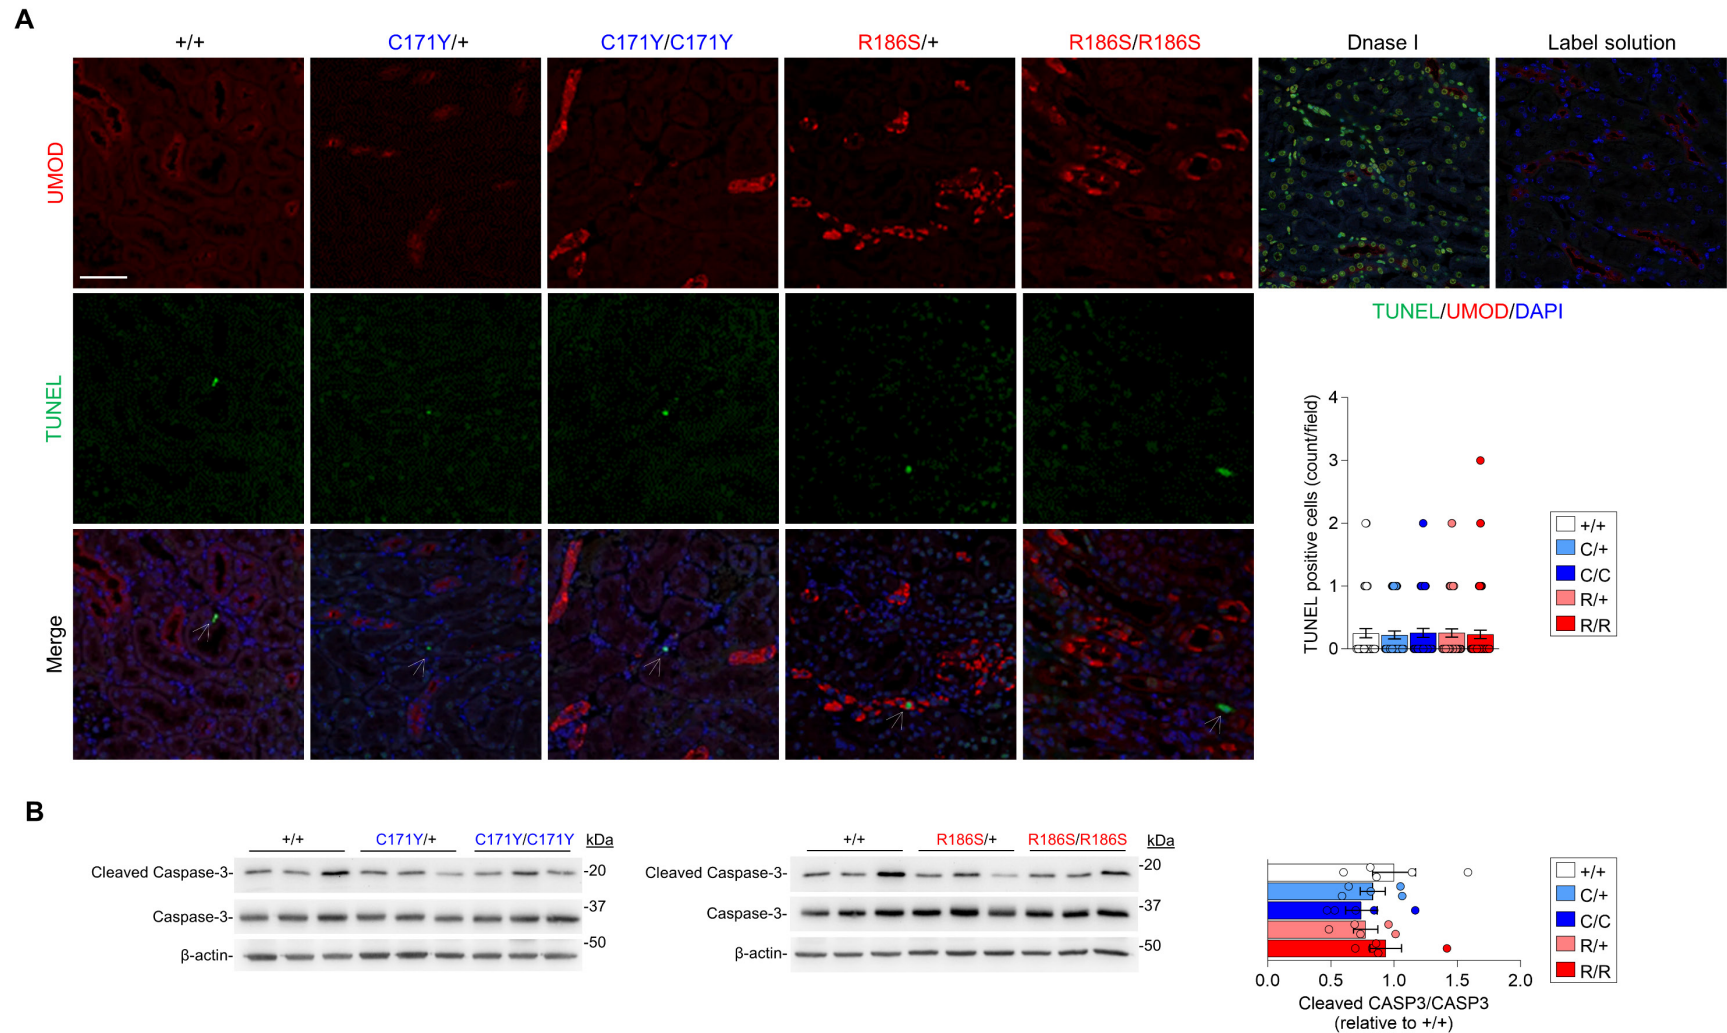

**Appendix Figure S4: Lack of apoptosis or caspase activation in *Umod* KI kidneys.**

(A) Immunofluorescence analysis of TUNEL (green) and UMOD (red) in kidney sections from 4-month-old *Umod* mutant ( $n \geq 45$  fields from 3-5 kidneys per condition). Nuclei are counterstained with DAPI (blue). Positive control incubated with DNase I and negative control incubated with label solution shown on right panel. Scale bar: 50  $\mu\text{m}$ . Each point of the quantification represents the number of TUNEL<sup>+</sup> cells in one field.

(B) Representative immunoblot analysis of caspase-3 (CASP3) and cleaved caspase-3 in whole kidney lysates from 4-month-old +/+, C171Y/+ and C171Y/C171Y mice (left) or +/+, R186S/+ and R186S/R186S mice (right).  $\beta$ -actin used as a loading control. Densitometry analysis is relative to +/+. Bars indicate mean  $\pm$  SEM. One-way ANOVA followed by Tukey's post-hoc test, ( $n = 5$  animals per group).

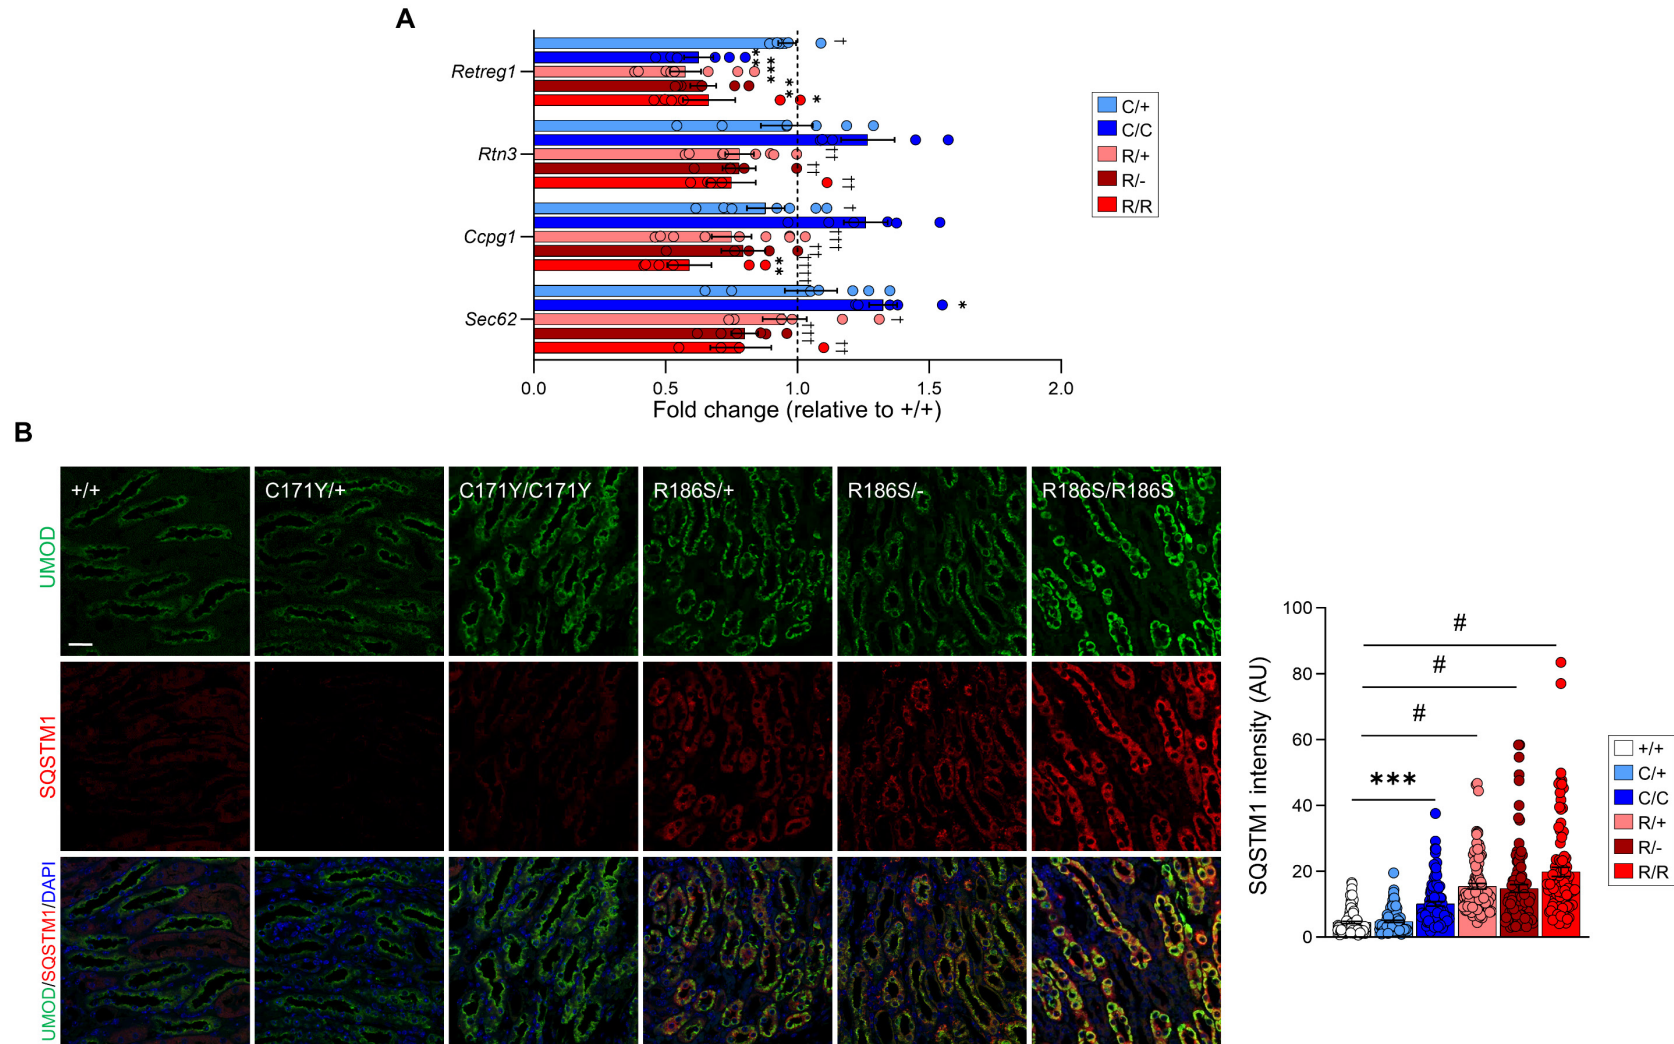

**Appendix Figure S5: Mutant UMOD degradation relies on mutation-specific mechanisms.**

(A) RT-qPCR analysis of ER-phagy genes in *Umod* KI kidneys (n=4 to 9 animals per group). Values are expressed as relative to +/+ (black dotted line).

*Retreg1*: \*\* $P(+/+ \text{ vs. } C/C)=0.0038$ , \*\*\* $P=0.0004$ , \* $P(+/+ \text{ vs. } R/-)=0.0061$ , \* $P=0.0113$ , † $P=0.0114$ ; *Rtn3*: †† $P(C/C \text{ vs. } R/+)=0.0012$ , ††† $P(C/C \text{ vs. } R/-)=0.004$ , ††† $P(C/C \text{ vs. } R/R)=0.0021$ ; *Ccpg1*: \*\* $P=0.0059$ , † $P=0.0127$ , ††† $P=0.0002$ , †† $P=0.0015$ , †††† $P<0.0001$ ; *Sec62*: \* $P=0.0494$ , † $P=0.016$ , ††† $P=0.0006$ , †† $P=0.0016$ .

(B) Representative immunofluorescence analysis of UMOD (green) and SQSTM1 (red) on kidney sections from 1-month-old *Umod* KI mice. Nuclei are counterstained with DAPI (blue).

Scale bar: 25  $\mu\text{m}$ , n = 100 tubules from 3 kidneys per condition. \*\*\* $P=0.0002$ , # $P<0.0001$ .

Bars indicate mean  $\pm$  SEM. One-way ANOVA followed by Tukey's post-hoc test.

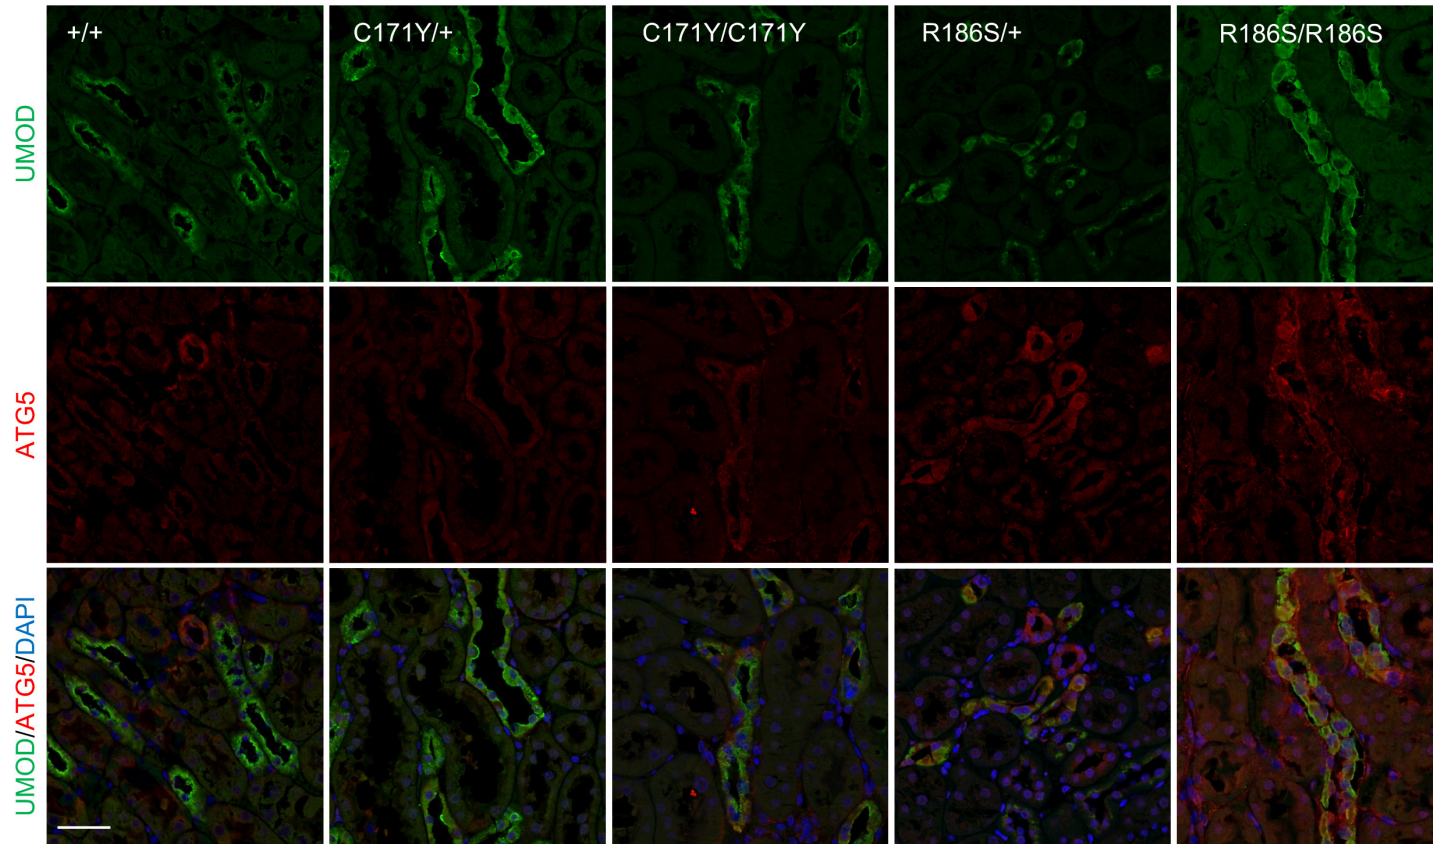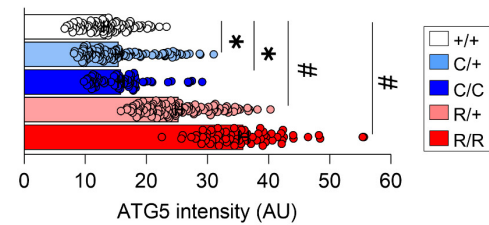

### Appendix Figure S6: Markers of autophagy induction in *Umod* KI mouse kidneys.

Representative immunofluorescence analysis of UMOD (green) and ATG5 (red) on kidney sections from 4-month-old *Umod* KI mice. Nuclei are counterstained with DAPI (blue). Scale bar: 25  $\mu$ m,  $n \geq 67$  tubules from 3 kidneys per condition. Bars indicate mean  $\pm$  SEM. One-way ANOVA followed by Tukey's post-hoc test, \* $P$ (+/+ vs. C/+)=0.032, \* $P$ (+/+ vs. C/C)=0.0153, # $P$ <0.0001.



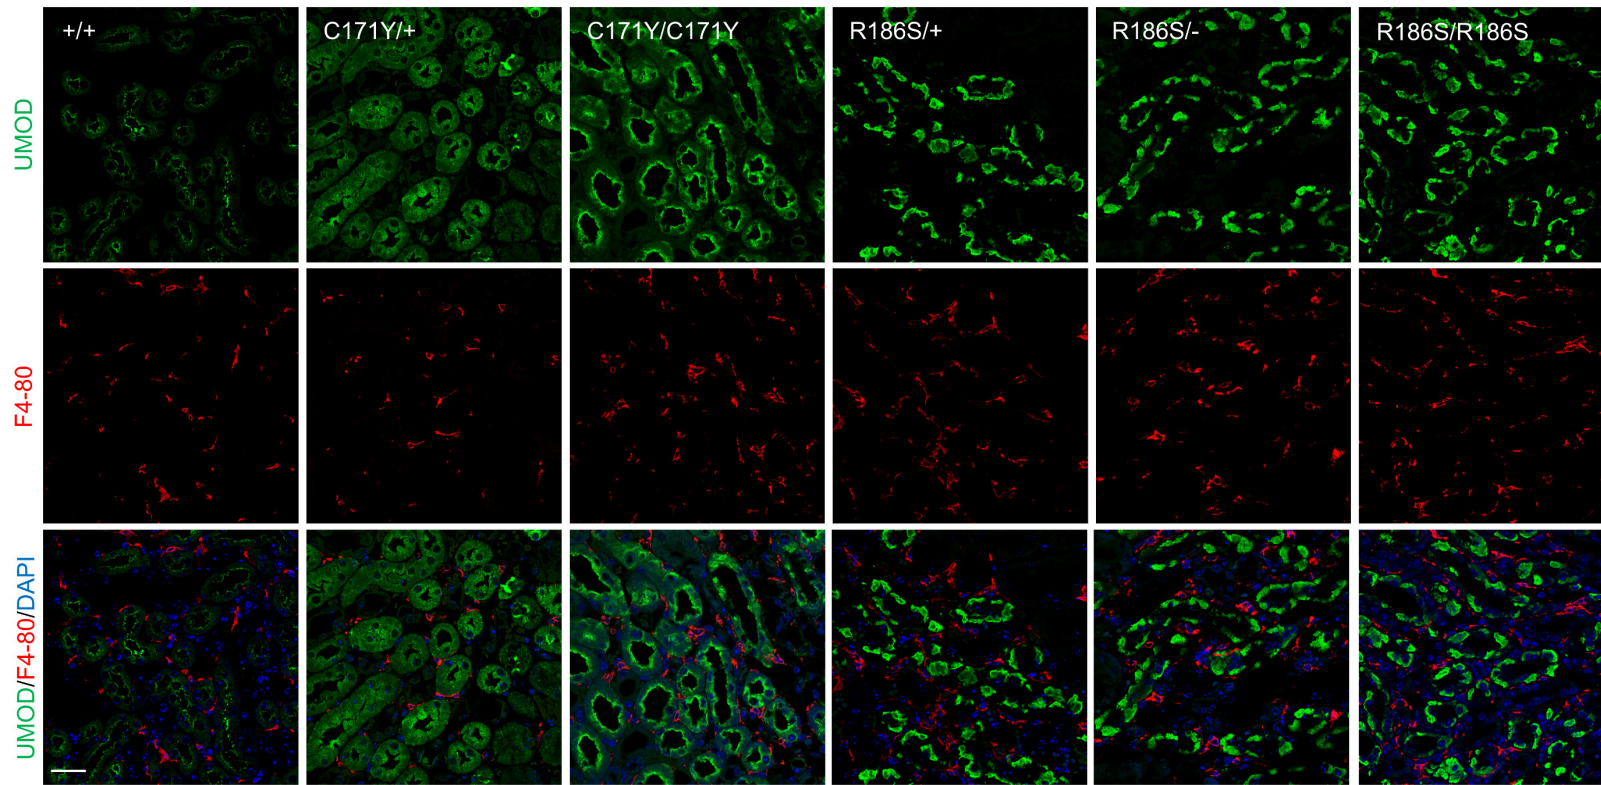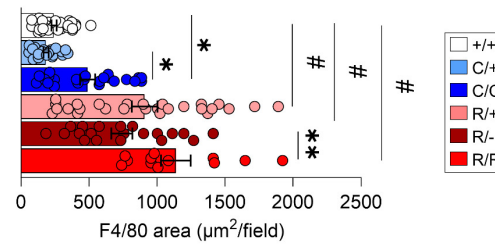

### Appendix Figure S7: Macrophage infiltration in *Umod* KI mouse kidneys.

Confocal analysis of kidney sections from 4-month mice stained with anti-uromodulin (green) and anti-F4-80 (red).  $n \geq 12$  fields from 3 kidneys per condition. Nuclei are stained with DAPI (blue). Scale bar: 25  $\mu\text{m}$ . Bars indicate the mean  $\pm$  SEM. One-way ANOVA with Tukey's post hoc test,  $*P(+/+ \text{ vs. } C/C)=0.0342$ ,  $*P(C/+ \text{ vs. } C/C)=0.0103$ ,  $**P=0.0059$ ,  $\#P<0.0001$ .

**A**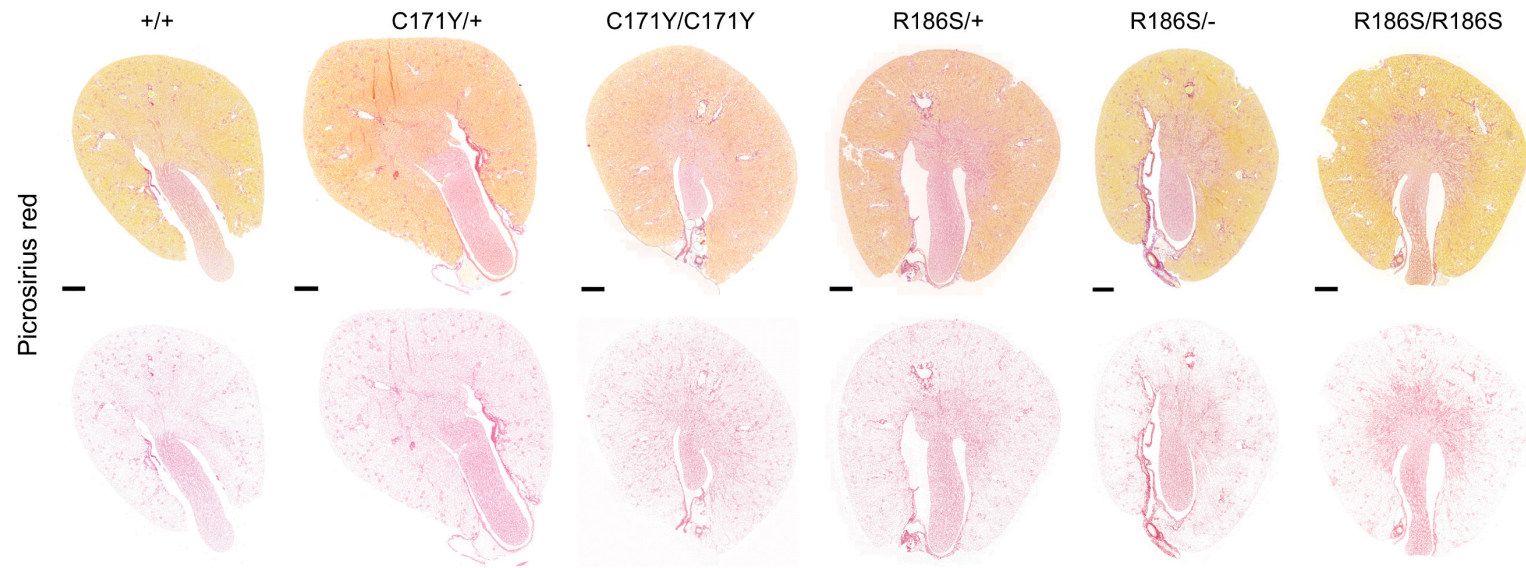**B**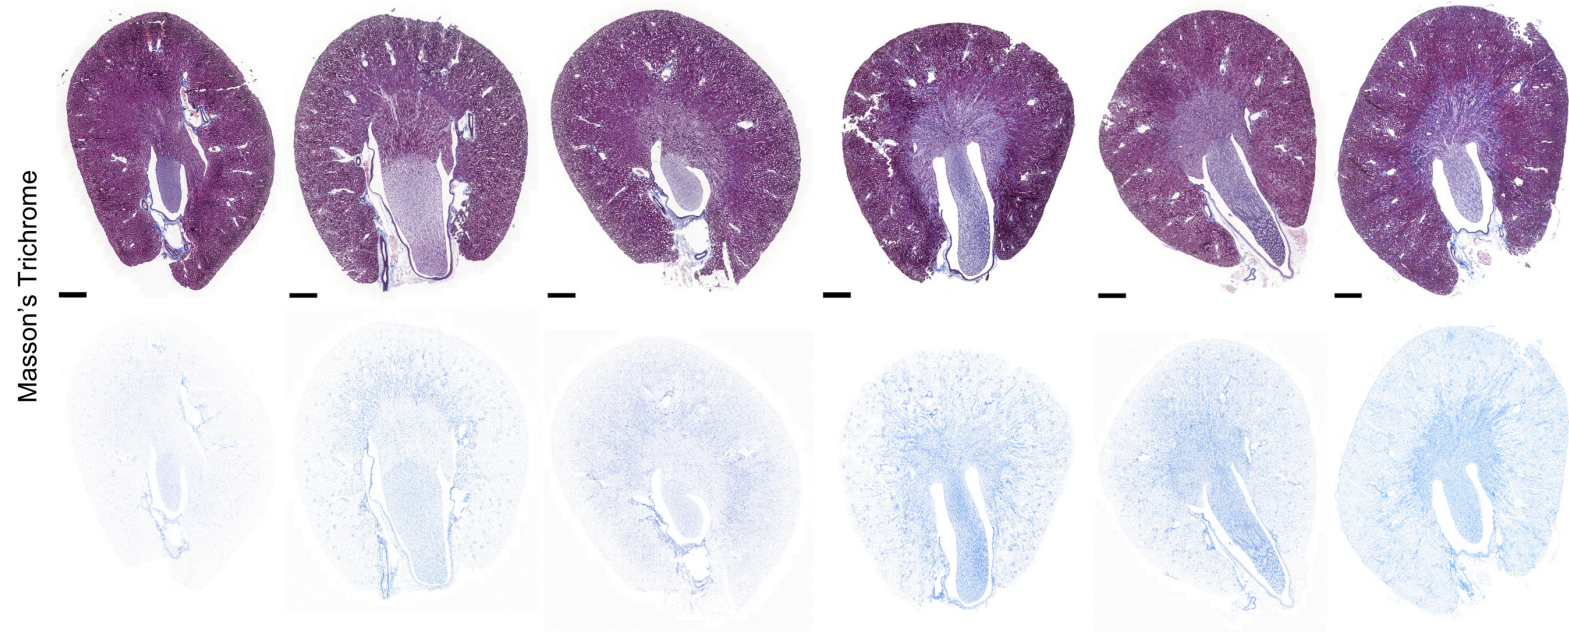

**Appendix Figure S8: Characterization of interstitial fibrosis in *Umod* KI mouse kidneys.**

(A-B) Representative Picrosirius red (A) and Masson's Trichrome (B) stainings on kidney sections from 4-month-old *Umod* KI mice (n=3 to 11 animals per group). Deconvoluted collagen signal is shown below each image. Scale bars: 100  $\mu$ m

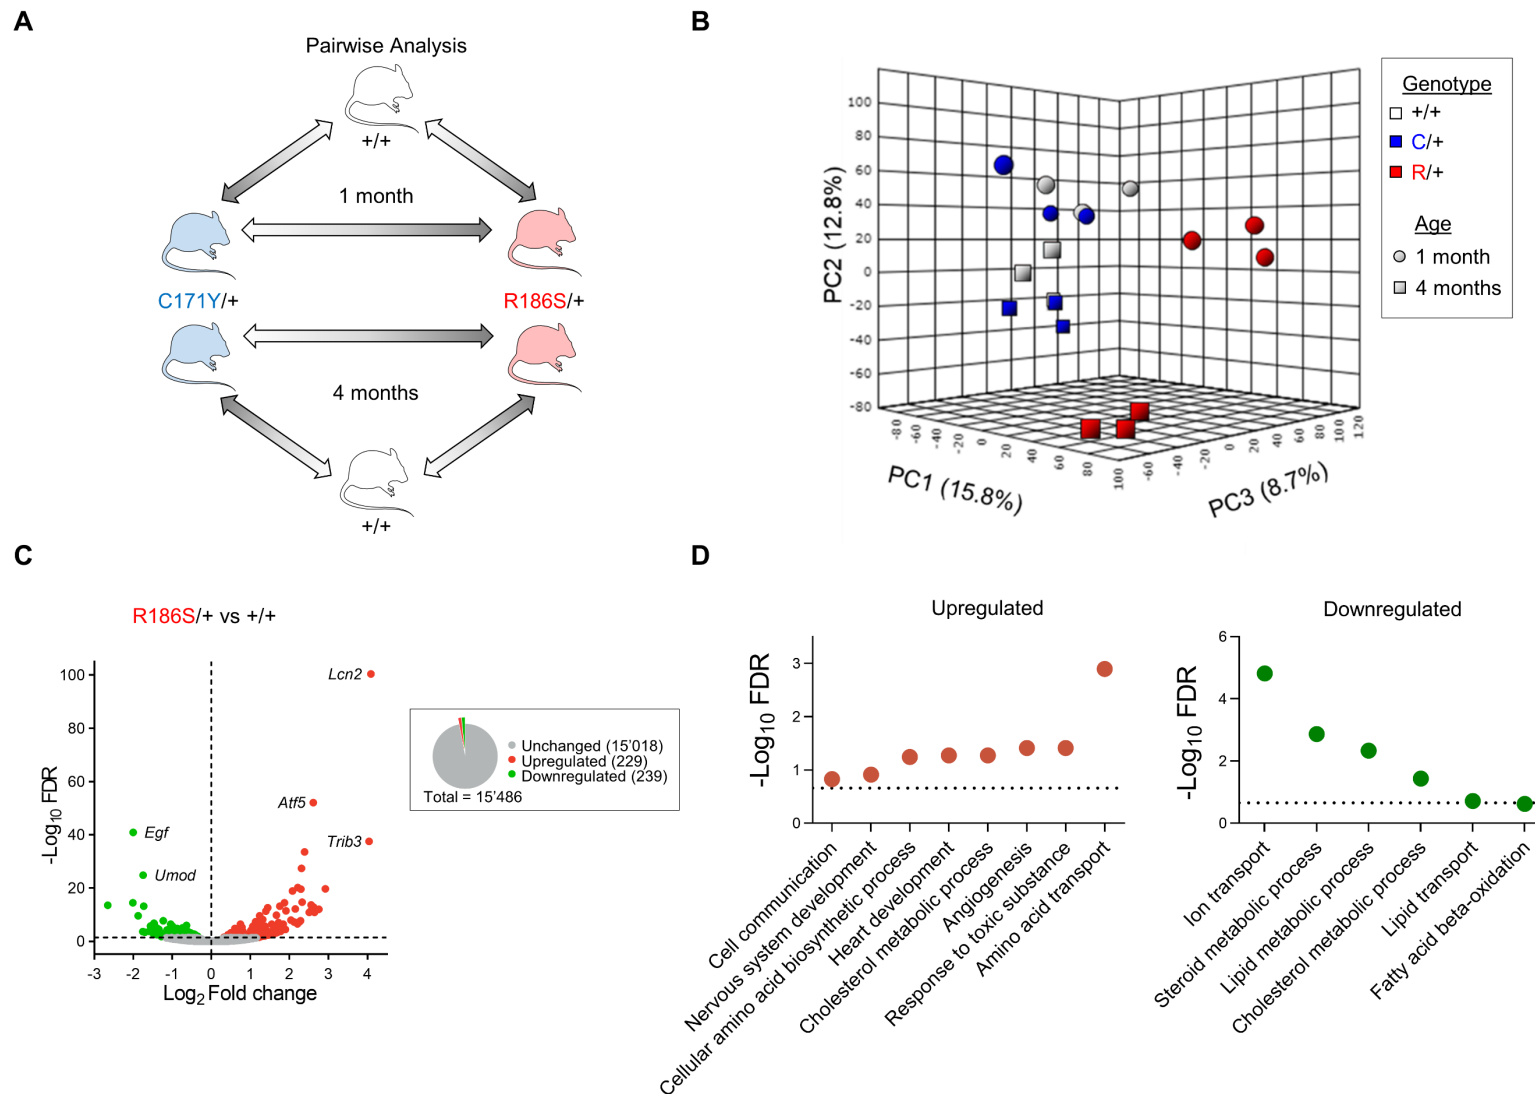

### Appendix Figure S9: RNA-seq analyses in 1-month-old R186S/+ kidneys.

(A) Experimental design for RNA-Seq on whole kidney lysates from 1 and 4 months male *Umod* KI mice.

(B) Principal component analysis (PCA) of RNA-Seq data of kidneys from 1-month-old and 4-month-old *Umod* KI mice.

(C) Volcano plot showing differently expressed genes (DEGs) between R186S/+ and +/+ 1-month-old kidneys. Genes not significantly changed ( $FDR > 0.05$ ) are shown in grey, whereas genes that are up- or downregulated in R186S/+ are shown in red and green respectively. The total number of unchanged, up- and downregulated genes are summarized in the pie chart.

(D) Over-representation analysis showing up- (red) and downregulated (green) biological processes of gene ontology in 1-month-old R186S/+ kidneys.

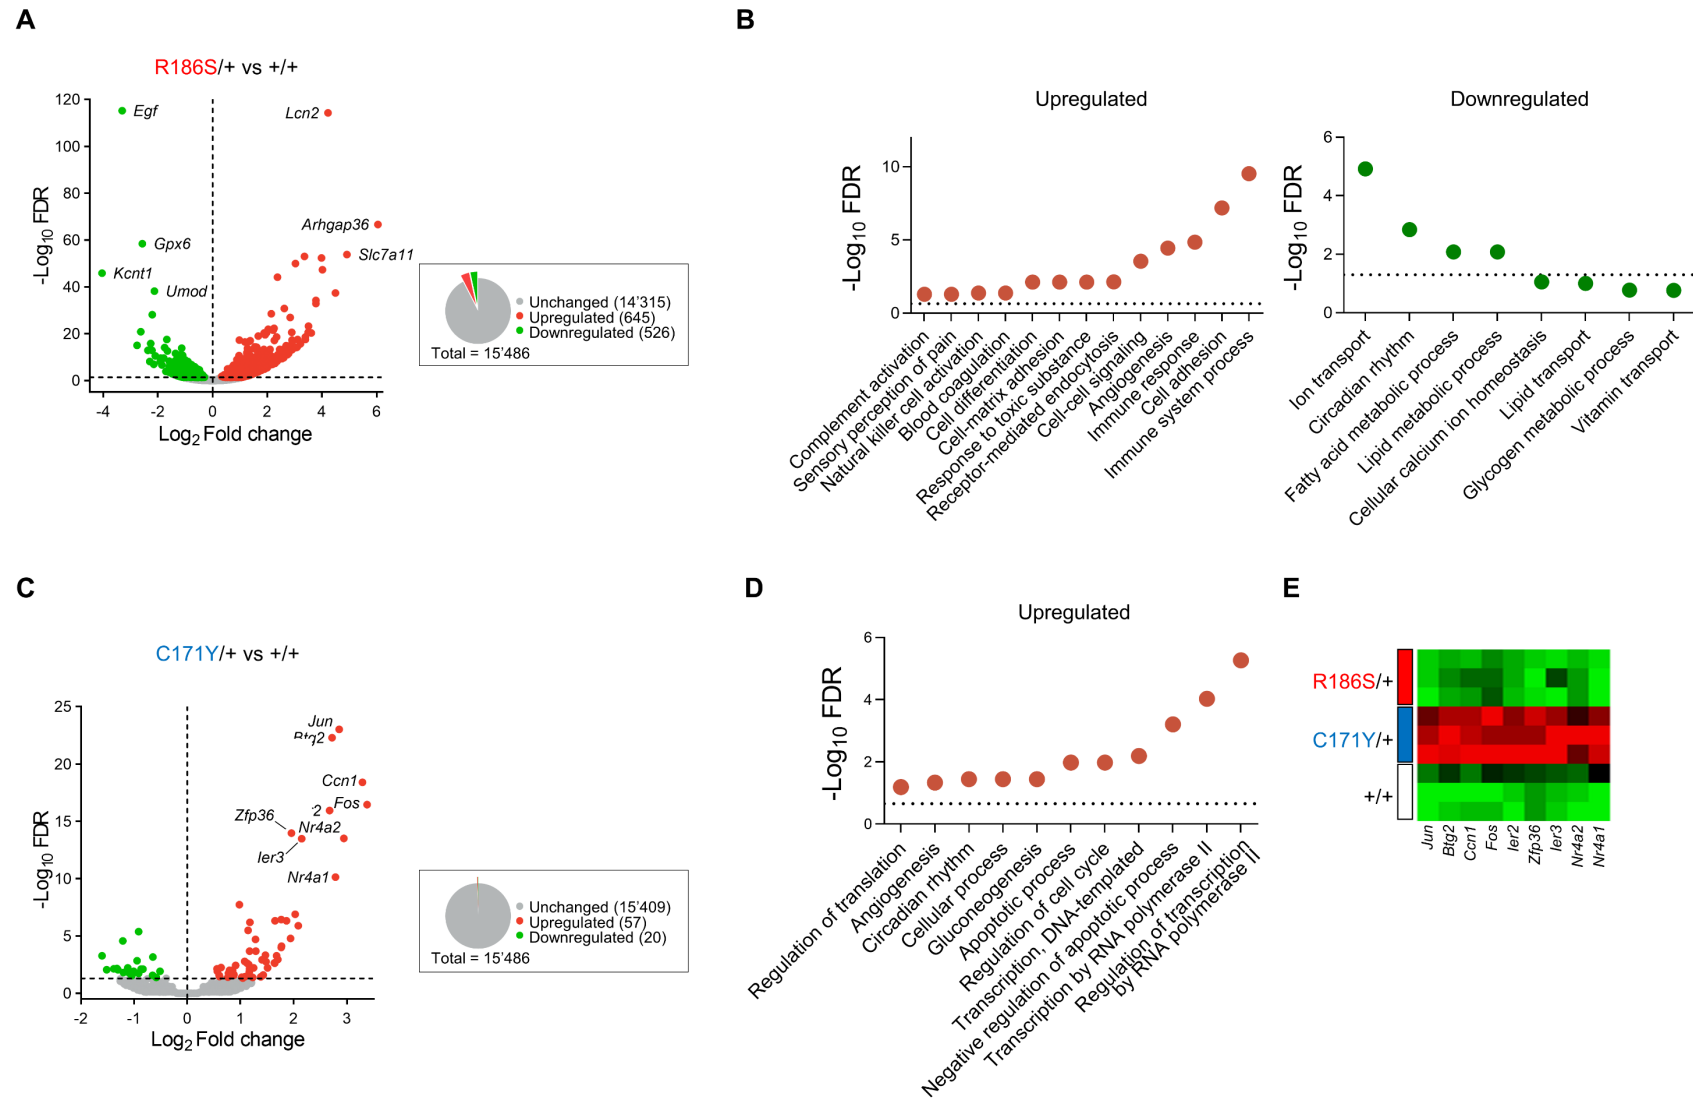

**Appendix Figure S10: Differential expression and affected pathways in 4-month-old *Umod* KI kidneys.**

(A) Volcano plot showing differentially expressed genes (DEGs) between +/+ and R186S/+ kidneys at 4 months.

(B) Over-representation analysis (ORA) showing up- and downregulated biological processes in 4-months-old R186S/+ kidneys.

(C) Volcano plot showing DEGs between C171Y/+ and +/+ kidneys at 4 months. Genes not significantly changed (FDR > 0.05) are shown in grey, whereas genes that are up- or downregulated in *Umod* KI are shown in red and green respectively. The total number of unchanged, up- and downregulated genes are summarized in the pie chart.

(D) ORA showing upregulated biological processes in 4-month-old C171Y/+ kidneys. No significantly downregulated pathways were identified. (e) Heatmap of transcriptional regulation genes upregulated in 4-month-old C171Y/+ kidneys.

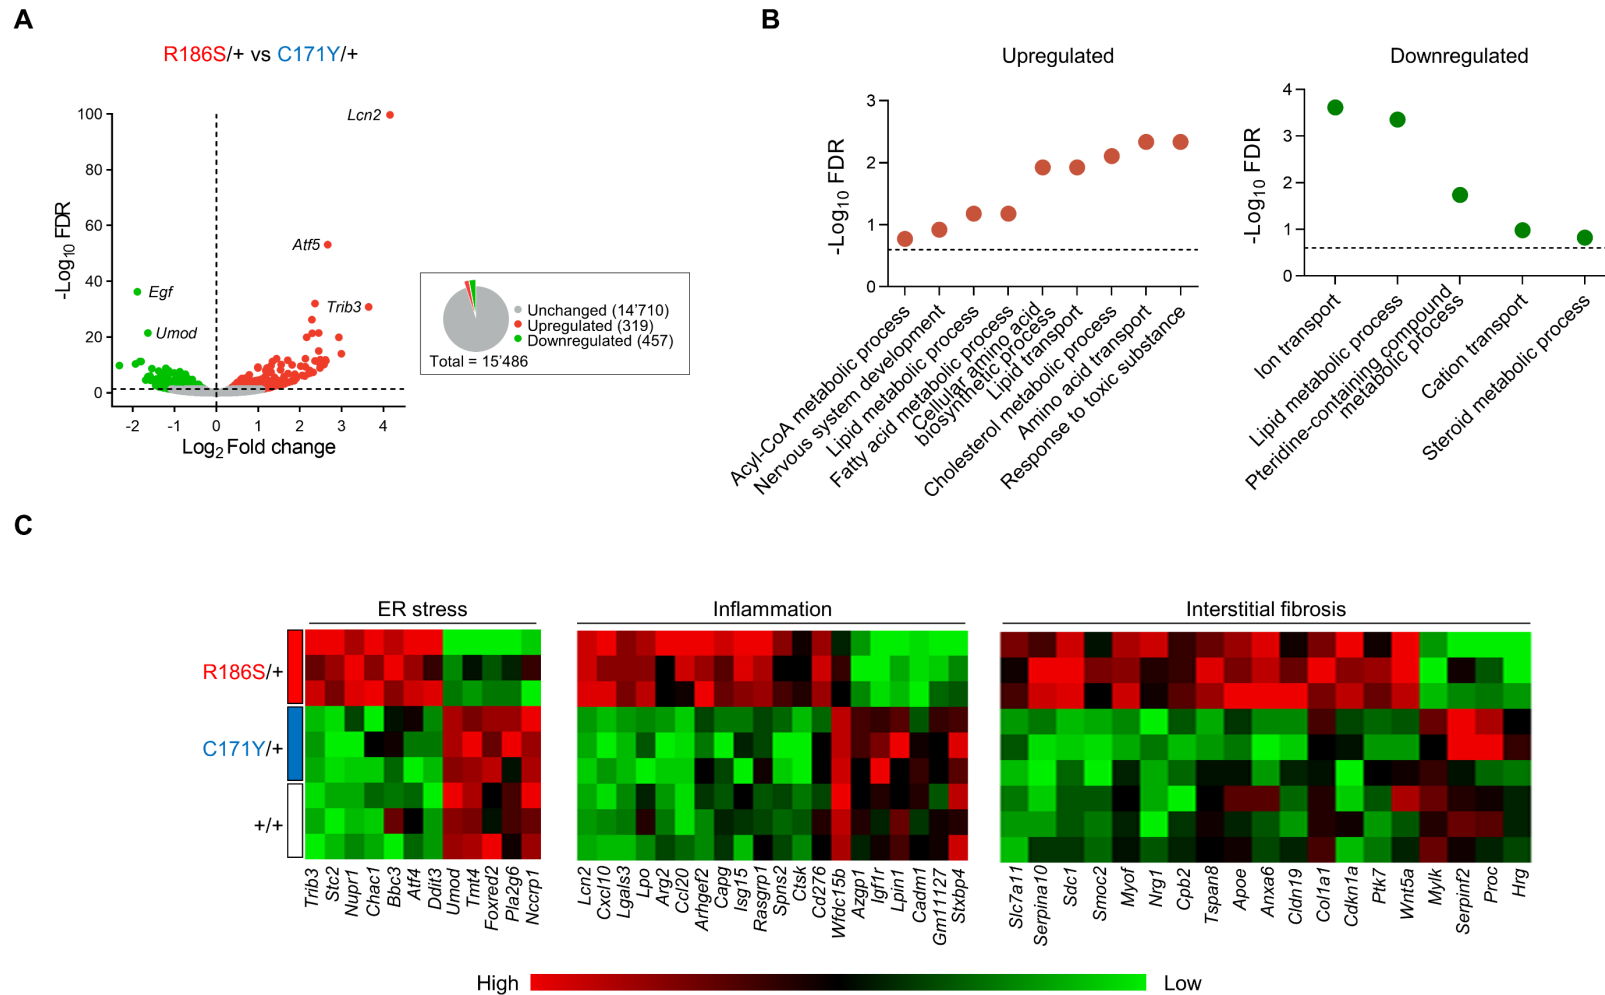

### Appendix Figure S11: Disease progression signature in *Umod* KI kidneys.

(A) Volcano plot showing differently expressed genes (DEGs) between R186S/+ and C171Y/+ kidneys at 1 month. Genes not significantly changed (FDR > 0.05) are shown in grey, whereas genes that are up- or downregulated in R186S/+ are shown in red and green respectively. The total number of unchanged, up- and downregulated genes are summarized in the pie chart.

(B) Over-representation analysis (ORA) showing up- (red) and downregulated (green) biological processes in 1-month-old R186S/+ kidneys compared to C171Y/+.

(C) Heat map of selected pathways involved in the disease progression of *Umod* KI mice at 1 month. R186S/+ kidneys showed upregulation of ER stress (*Atf4*, *Ddit3*, *Nupr1*, *Trib3*), increased expression of genes associated with inflammation (*Lcn2*, *Lgals3*) and fibrosis (*Serpina10*, *Col1a1*), whereas C171Y/+ kidneys were virtually indistinguishable from +/+.

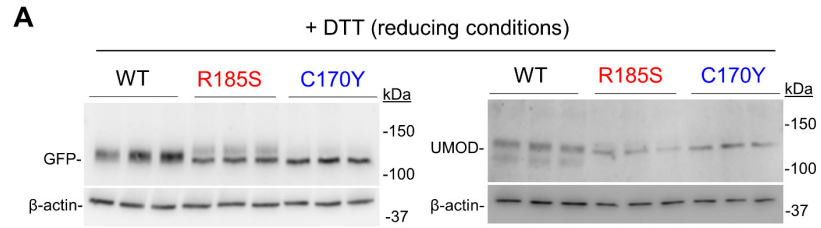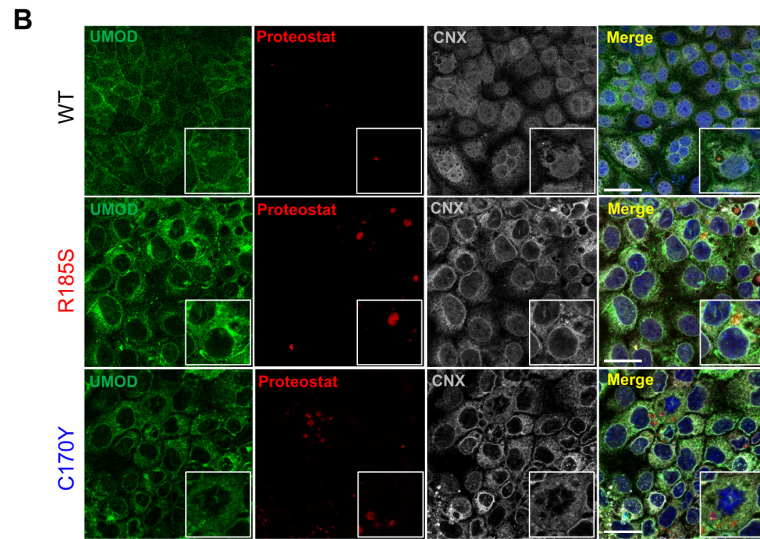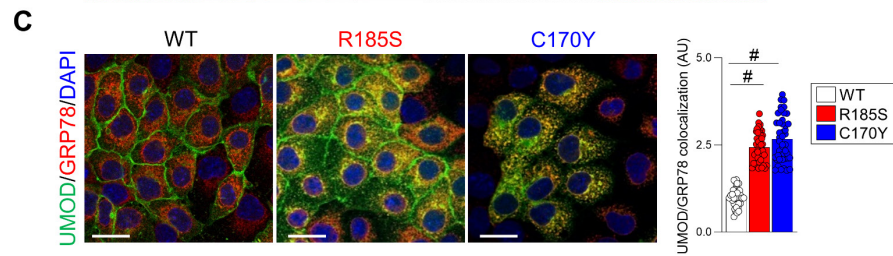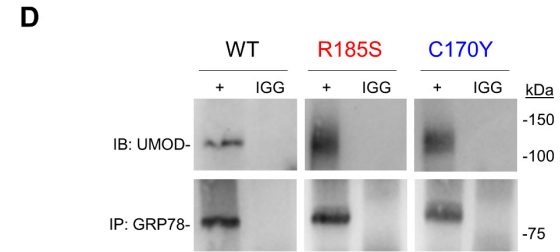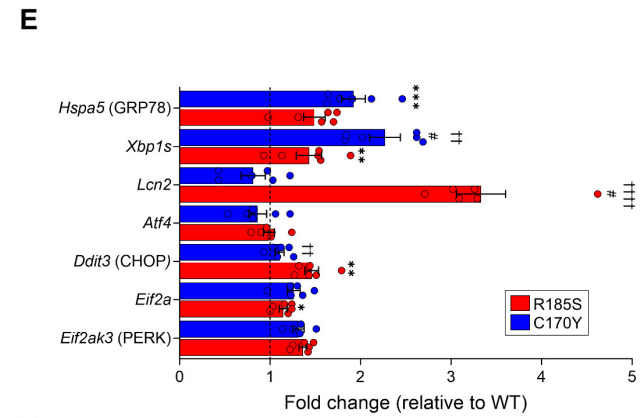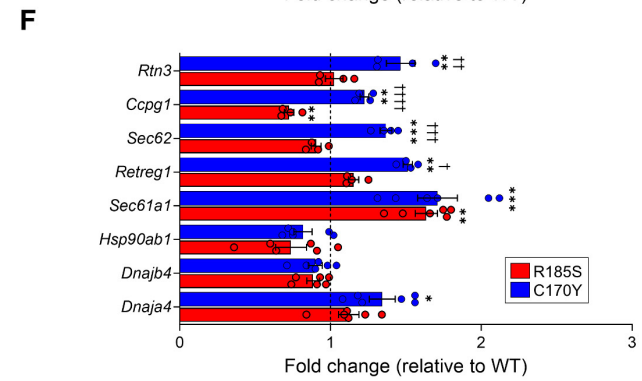

## Appendix Figure S12: Distinct UMOD mutations trigger differential ER quality control responses.

(A) Immunoblot analysis of GFP and UMOD in lysates from *UMOD-GFP* cells. Samples were run in reducing conditions.  $\beta$ -actin used as a loading control.

(B) Immunofluorescence analysis of UMOD (green), Proteostat (red) and CNX (gray) in *UMOD-GFP* cells. Scale bar: 30  $\mu$ m.

(C) Immunofluorescence analysis of UMOD (green) and GRP78/BiP (red) in *UMOD-GFP* cells. Co-localization is expressed as arbitrary units (AU). Scale bar: 30  $\mu$ m (n=33 to 44 cells per group), <sup>#</sup>*P*<0.0001.

(D) Co-immunoprecipitation experiments in *UMOD-GFP* cells showing interaction between UMOD and GRP78/BiP.

(E) RT-qPCR analysis of unfolded protein response (UPR) effectors in *UMOD-GFP* cells. Values are expressed as relative to WT (black dotted line, n = 6 biological replicates). *Hspa5*:

<sup>\*\*\*</sup>*P*(WT vs. C170Y)=0.0008; *Xbp1s*: <sup>#</sup>*P*(WT vs. C170Y)<0.0001, <sup>††</sup>*P*(C170Y vs. R185S)=0.0018, <sup>\*\*</sup>*P*(WT vs. R185S)=0.0045; *Len2*: <sup>#</sup>*P*(WT vs. R185S)<0.0001, <sup>††††</sup>*P*(C170Y vs.

R185S)<0.0001; *Ddit3*: <sup>\*\*</sup>*P*(WT vs. R185S)=0.0083, <sup>††</sup>*P*(WT vs. C170Y)=0.0019, *Eif2a*: <sup>\*</sup>*P*(WT vs. R185S)=0.0118.

(F) RT-qPCR analysis of protein folding/degradation genes in *UMOD-GFP* cells. Values are expressed as relative to WT (black dotted line) (n=4 to 6 biological replicates). *Rtn3*: <sup>\*\*</sup>*P*(WT vs.

C170Y)=0.002, <sup>††</sup>*P*=0.0028 (C170Y vs. R185S); *Cepgl*: <sup>\*\*</sup>*P*(WT vs. C170Y)=0.0078, <sup>††††</sup>*P*(C170Y vs. R185S)<0.0001, <sup>\*\*</sup>*P*(WT vs. R185S)=0.0023; *Sec62*: <sup>\*\*\*</sup>*P*(WT vs. C170Y)=0.0008,

<sup>†††</sup>*P*(C170Y vs. R185S)=0.0002; *Retreg1*: <sup>\*\*</sup>*P*(WT vs. C170Y)=0.002, <sup>†</sup>*P*(R185S vs. C170Y)=0.017; *Sec61a1*: <sup>\*\*\*</sup>*P*(WT vs. C170Y)=0.0005, <sup>\*\*</sup>*P*(WT vs. R185S)=0.0013; *Dnaja4*: <sup>\*</sup>*P*(WT vs. C170Y)=0.0209.

Bars indicate mean  $\pm$  SEM. One-way ANOVA followed by Tukey's post-hoc test.



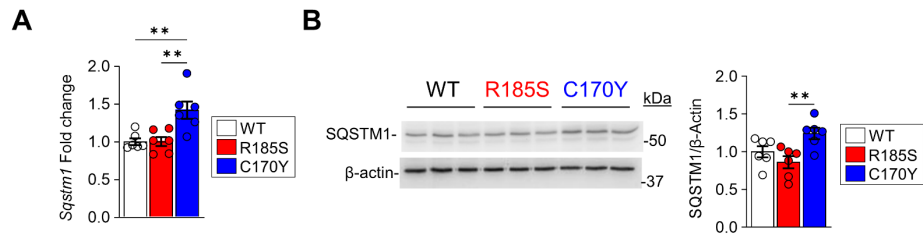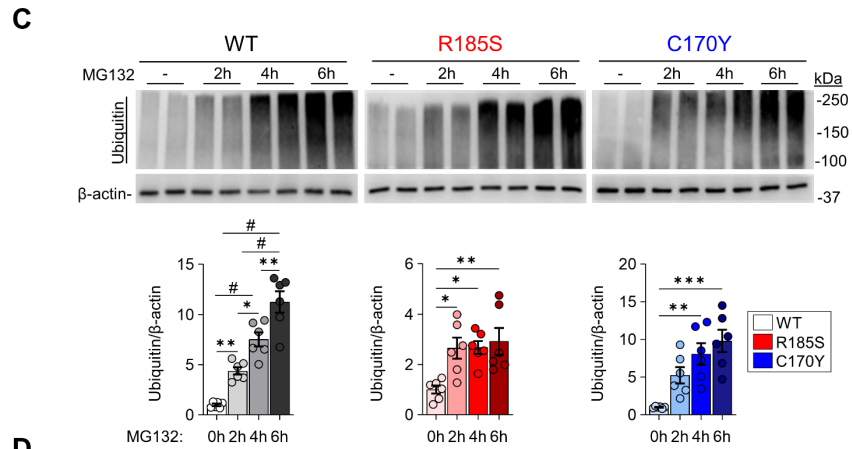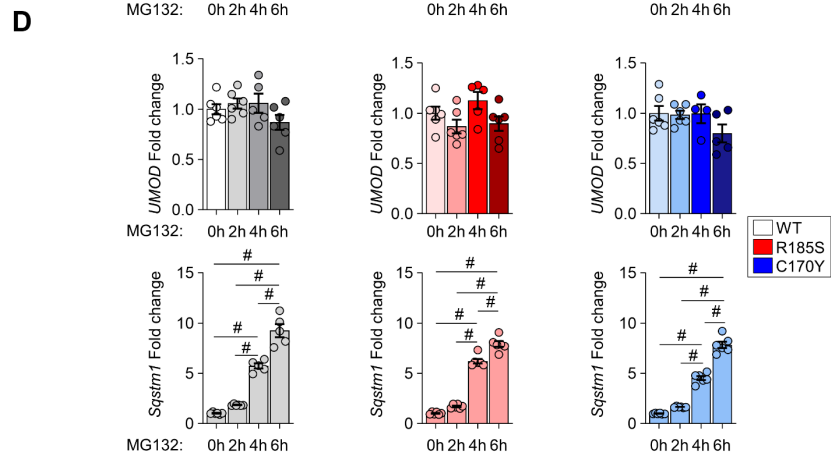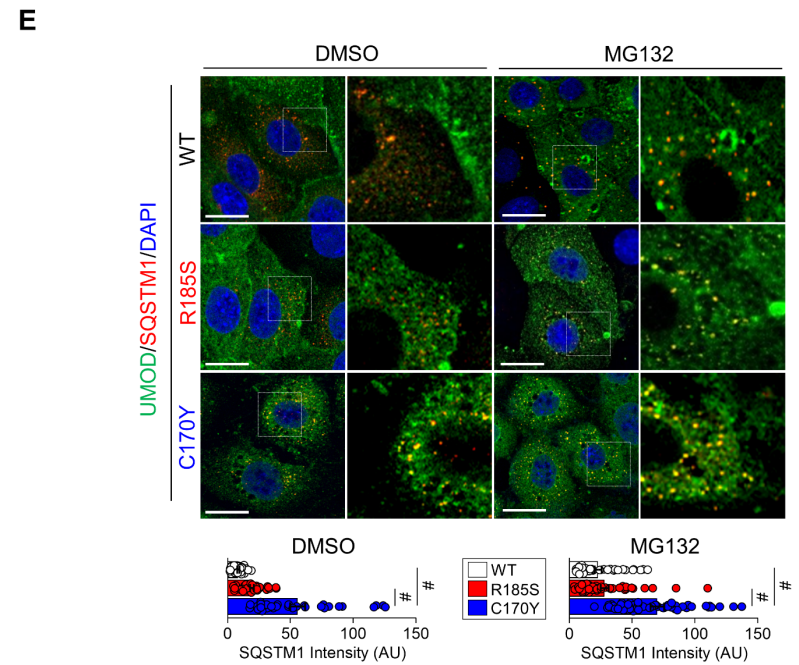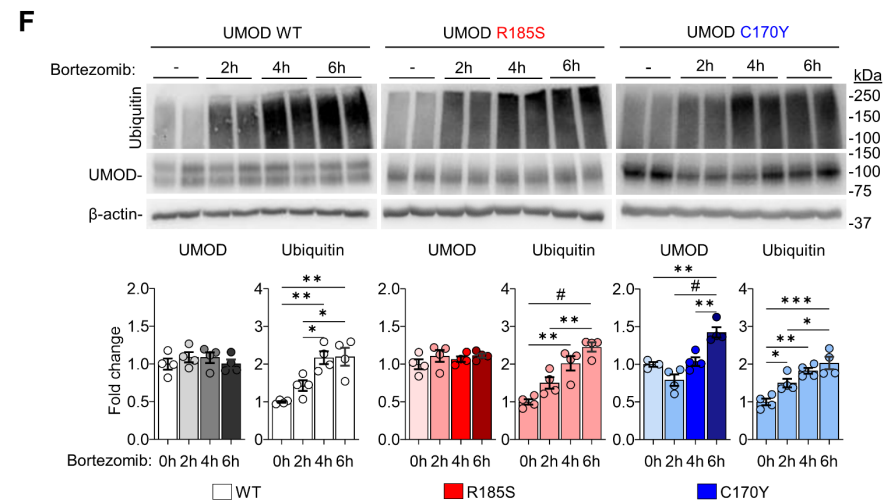

### Appendix Figure S13: Proteasomal inhibition induces mutant UMOD accumulation.

(A) RT-qPCR analysis of *Sqstm1* gene in *UMOD-GFP* cells. Values are expressed as relative to WT cells (n=6 biological replicates), \*\* $P$ (R185S vs. C170Y)=0.0058, \*\* $P$ (WT vs. C170Y)=0.0056.

(B) Immunoblot analysis of SQSTM1 in *UMOD-GFP* cells.  $\beta$ -actin used as a loading control. Densitometry analysis relative to WT cells (n=6 biological replicates), \*\* $P$ =0.0084.

(C) Immunoblot analysis of ubiquitin in *UMOD-GFP* cell lysates following MG123 time course. Densitometry analysis relative to untreated cells (n = 6 biological replicates). WT: \*\* $P$ (0h vs. 2h)=0.0096, \* $P$ =0.0177, \*\* $P$ (4h vs. 6h)= 0.0041; R185S: \* $P$ (0h vs. 2h)=0.0177, \* $P$ (0h vs. 4h)=0.0216, \*\* $P$ =0.0079; C170Y: \*\* $P$ =0.002, \*\*\* $P$ =0.0002.

(D) RT-qPCR analysis of *UMOD* and *Sqstm1* genes in *UMOD-GFP* cells following time-dependent MG132 treatment. Values are relative to untreated (0h) cells (n  $\geq$ 4 biological replicates), # $P$ <0.0001.

(E) Representative immunofluorescence of UMOD (green) and SQSTM1 (red) in *UMOD-GFP* cells. Nuclei counterstained with DAPI (blue). Scale bar: 15  $\mu$ m (n = 30 cells per group), # $P$ <0.0001.

(F) Immunoblot analysis of ubiquitin, UMOD in *UMOD-GFP* cell lysates following Bortezomib time-course.  $\beta$ -actin used as a loading control. Densitometry analysis relative to fed cells (n  $\geq$ 4 biological replicates). WT, Ubiquitin: \*\* $P$ (0h vs. 4h)=0.0013, \*\* $P$ (0h vs. 6h)=0.0011, \* $P$ (2h vs. 4h)=0.0322, \* $P$ (4h vs. 6h)=0.0267; R185S, Ubiquitin: \*\* $P$ (0h vs. 4h)=0.0013, \*\* $P$ (2h vs. 6h)=0.0022; C170Y, UMOD: \*\* $P$ (0h vs. 6h)=0.0045, \*\* $P$ (4h vs. 6h)=0.0051; Ubiquitin: \* $P$ (0h vs. 2h)=0.0429, \*\* $P$ =0.0014, \*\*\* $P$ =0.0002, \* $P$ (2h vs. 6h)=0.031; # $P$ <0.0001.

Bars indicate mean  $\pm$  SEM. One-way ANOVA followed by Tukey's post-hoc test.

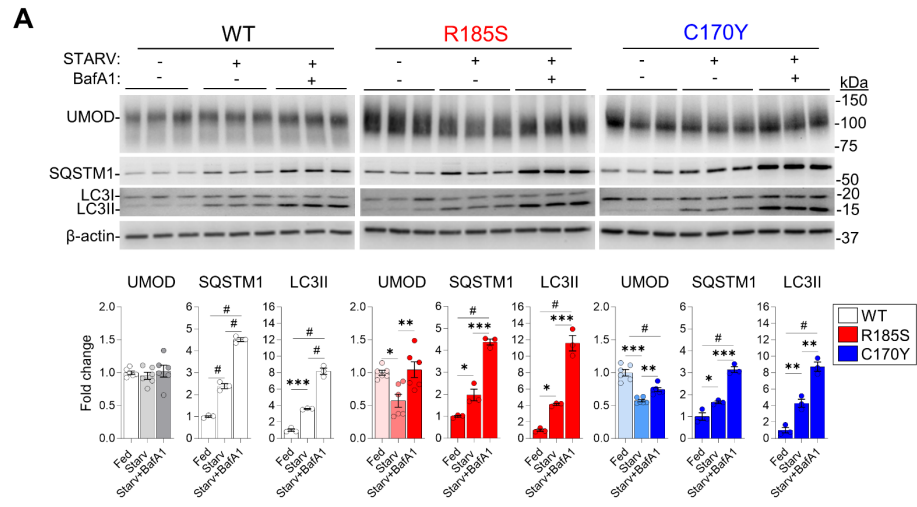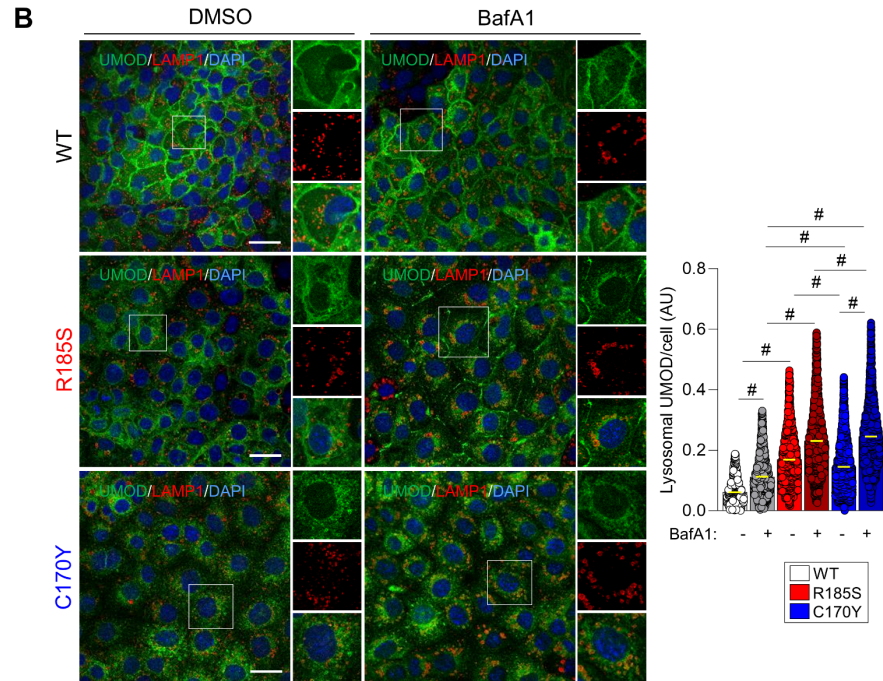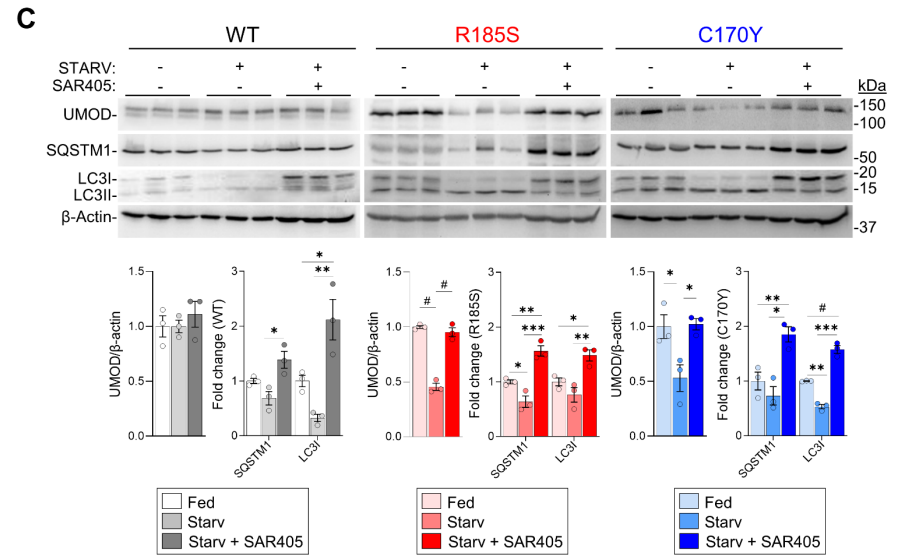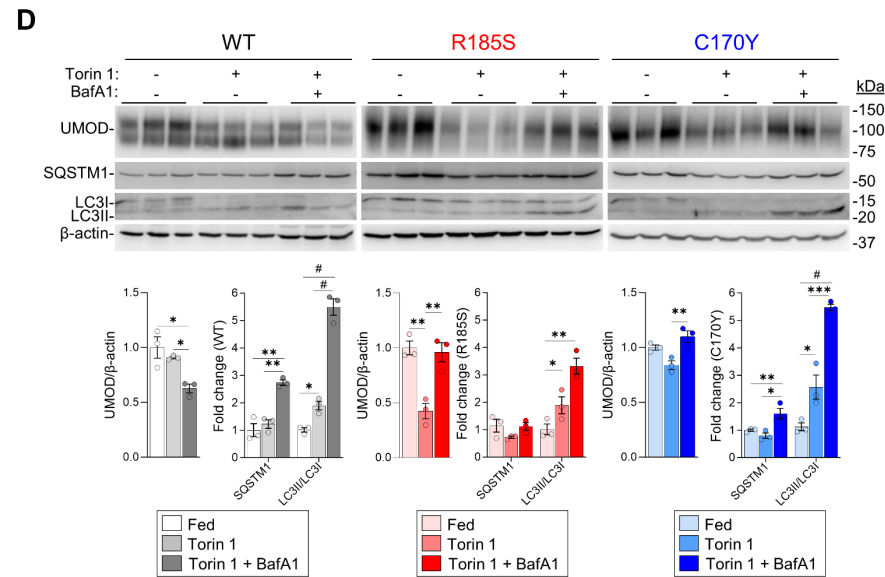

### Appendix Figure S14: Autophagy modulation impacts on mutant UMOD levels.

(A) Immunoblot analysis of UMOD, SQSTM1 and LC3 in *UMOD-GFP* cell lysates following starvation and Bafilomycin A1 treatment.  $\beta$ -actin used as a loading control. Densitometry analysis relative to fed (n=3 biological replicates), WT, LC3II: \*\*\* $P=0.0007$ ; R185S, UMOD: \* $P=0.0136$ , \*\* $P=0.0067$ ; SQSTM1: \* $P=0.0175$ , \*\*\* $P=0.0002$ ; LC3II: \* $P=0.0164$ , \*\*\* $P=0.0002$ ; C170Y, UMOD: \*\*\* $P=0.0003$ , \*\* $P=0.0096$ ; SQSTM1: \* $P=0.0282$ , \*\*\* $P=0.0004$ ; LC3II: \*\* $P(\text{Fed vs. Starv})=0.006$ , \*\* $P(\text{Starv vs. Starv+ BafA1})=0.0013$ ; # $P<0.0001$ .

(B) Representative immunofluorescence of UMOD (green) and LAMP1 (red) in *UMOD-GFP* cells following BafA1 treatment. Nuclei counterstained with DAPI (blue). Scale bar: 15  $\mu\text{m}$  (n  $\geq$  20 cells/field, 5 fields per condition), # $P<0.0001$ .

(C) Immunoblot analysis of UMOD, SQSTM1 and LC3 in *UMOD-GFP* cell lysates following SAR405 treatment. Densitometry analysis relative to fed (n=3 biological replicates).

WT, SQSTM1: \* $P=0.0129$ ; LC3I: \*\* $P=0.0033$ , \* $P=0.0296$ ; R185S, SQSTM1: \* $P=0.0486$ , \*\* $P=0.0073$ , \*\*\* $P=0.0005$ ; LC3I: \*\* $P=0.0070$ , \* $P=0.0410$ ; C170Y, UMOD: \* $P(\text{Fed vs. Starv})=0.0342$ , \* $P(\text{Starv vs. Starv + SAR405})=0.0283$ ; SQSTM1: \*\* $P=0.055$ , \* $P=0.0198$ ; LC3I: \*\* $P=0.0011$ , \*\*\* $P=0.0004$ ; # $P<0.0001$ .

(D) Immunoblot analysis of UMOD, SQSTM1 and LC3 in *UMOD-GFP* cell lysates following Torin 1 and BafA1 treatment. Densitometry analysis relative to fed cells (n=3 biological replicates). WT, UMOD: \* $P(\text{Fed vs. Torin 1})=0.0118$ , \* $P(\text{Torin 1 vs. Torin 1+BafA1})=0.0399$ ; SQSTM1: \*\* $P(\text{Fed vs. Torin 1+BafA1})=0.001$ , \*\* $P(\text{Torin 1 vs. Torin 1+BafA1})=0.0022$ ; LC3II/I: \* $P=0.0476$ ; R185S, UMOD: \*\* $P(\text{Fed vs. Torin 1})=0.0035$ , \*\* $P(\text{Torin 1 vs. Torin 1+BafA1})=0.005$ ; LC3II/I: \* $P=0.023$ , \*\* $P=0.0023$ ; C170Y, UMOD: \*\* $P=0.0096$ ; SQSTM1: \* $P=0.0336$ , \*\* $P=0.0094$ ; LC3II/I: \* $P=0.0229$ , \*\*\* $P=0.0007$ ; # $P<0.0001$ .

Bars indicate mean  $\pm$  SEM. One-way ANOVA followed by Tukey's post-hoc test.

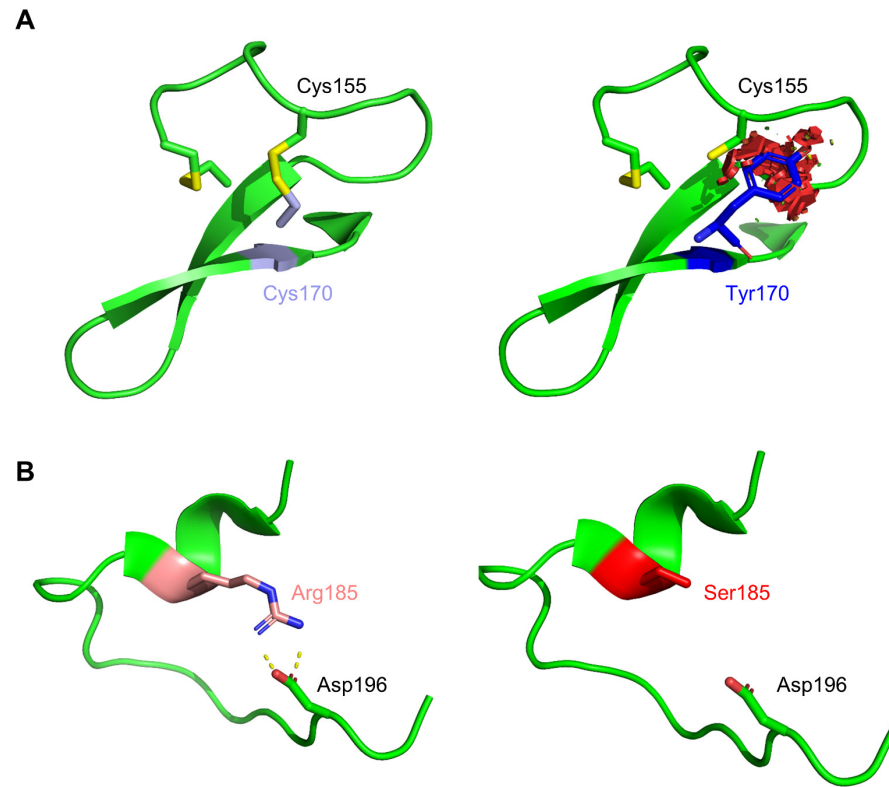

**Appendix Figure S15: Structural modelling of UMOD mutations**

(**A, B**) Modeling of the UMOD p.Cys170Tyr (**A**) and p.Arg185Ser (**B**) mutants. Clashes in the structure are represented by red dots and are visible only in the p.Cys170Tyr mutant. Models were generated with PyMOL (Schrödinger LLC).

Figure 2C

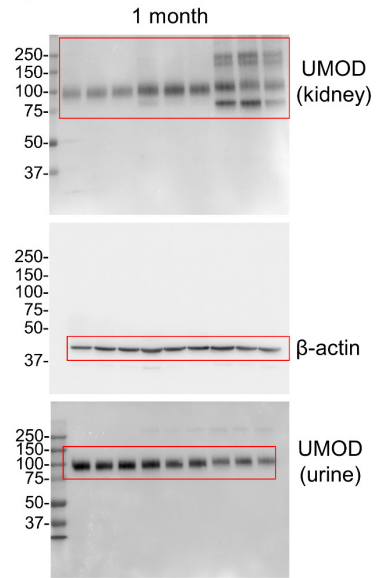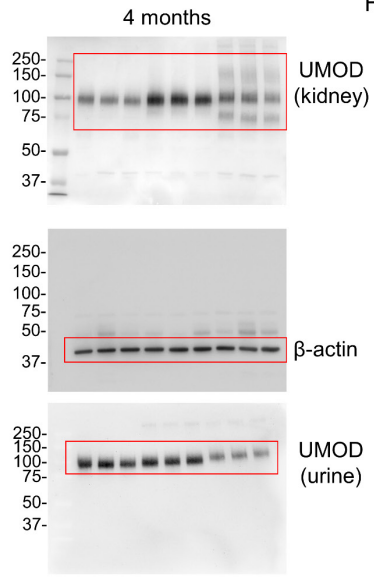

Figure 2D

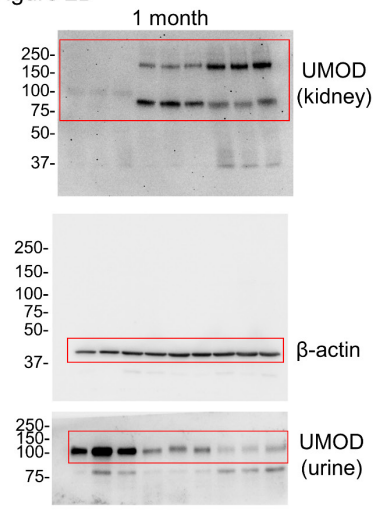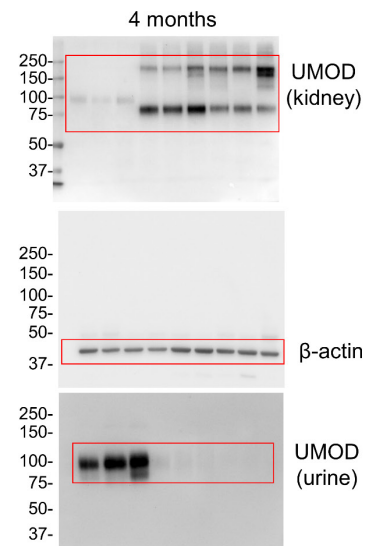

Figure 3B

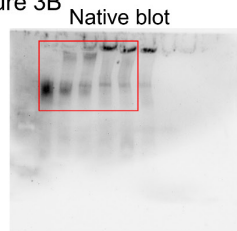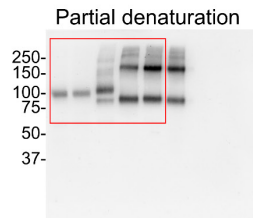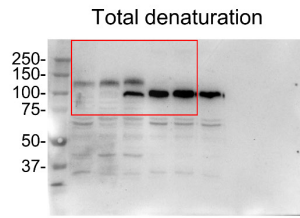

Figure 3D

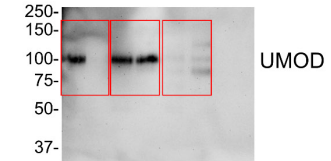

Figure 3D

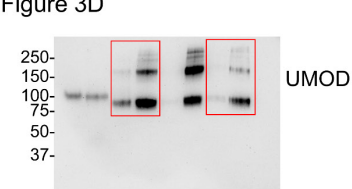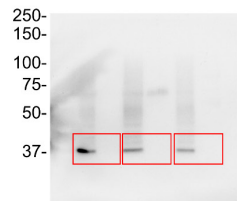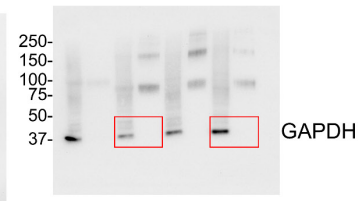

Appendix Figure S16: Uncropped Western blot membranes.

Figure 4C

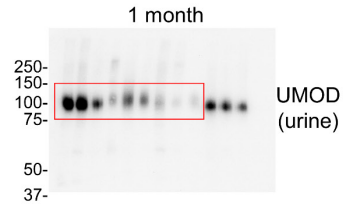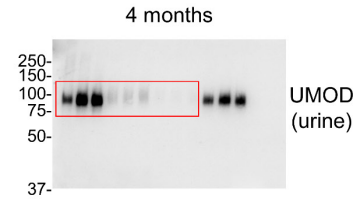

Figure 4D

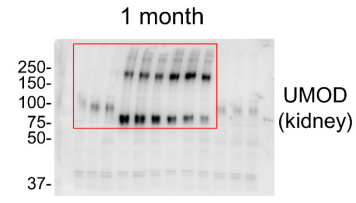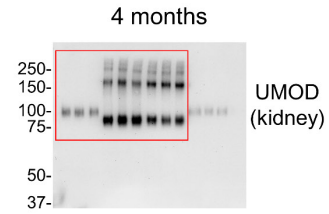

Figure 4D

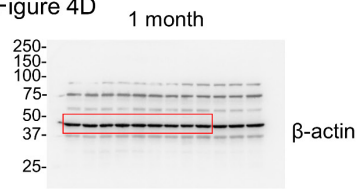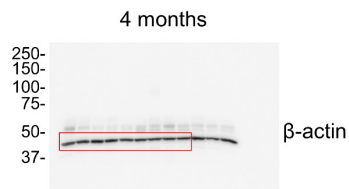

Figure 4E

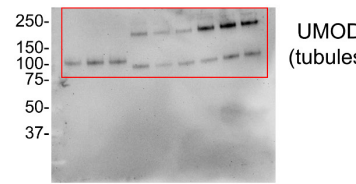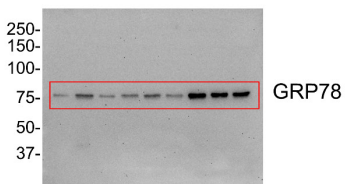

Figure 4E

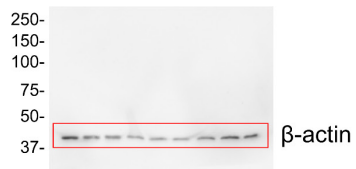

Figure 5A

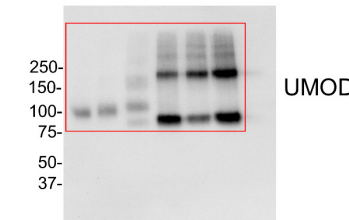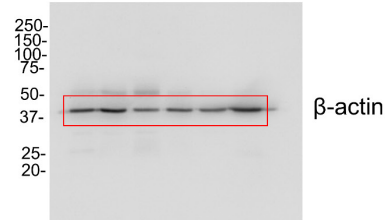

Figure 7A

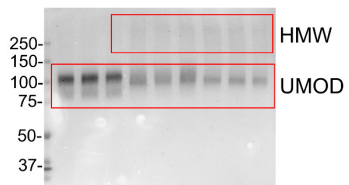

Figure 7B

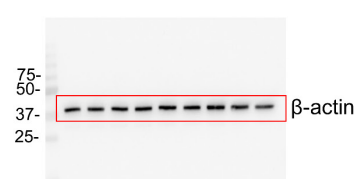

Figure 7B

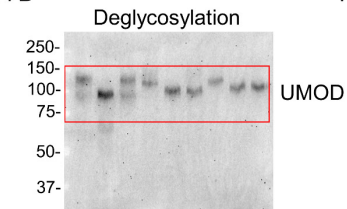

Figure 7C

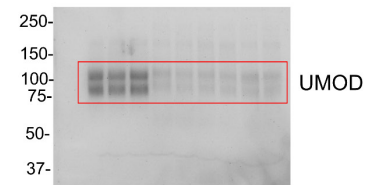

Appendix Figure S16 (continued).

Figure 7G

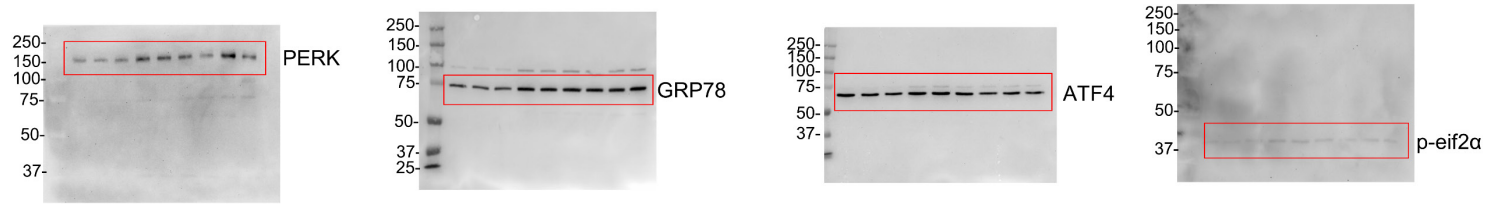

Figure 7G

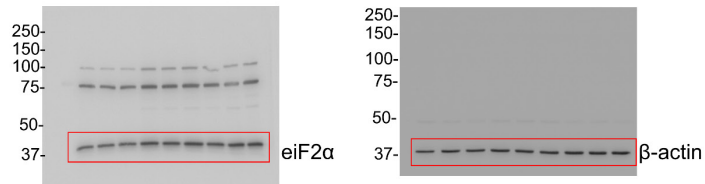

Figure 8B

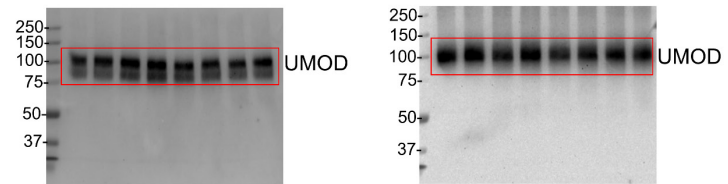

Figure 8B

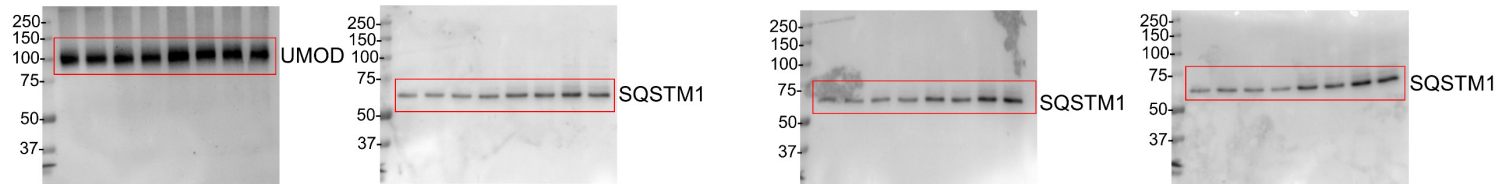

Figure 8B

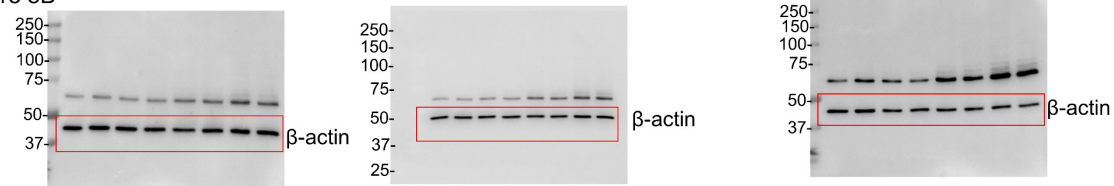

Appendix Figure 16 (continued).



Figure 8D

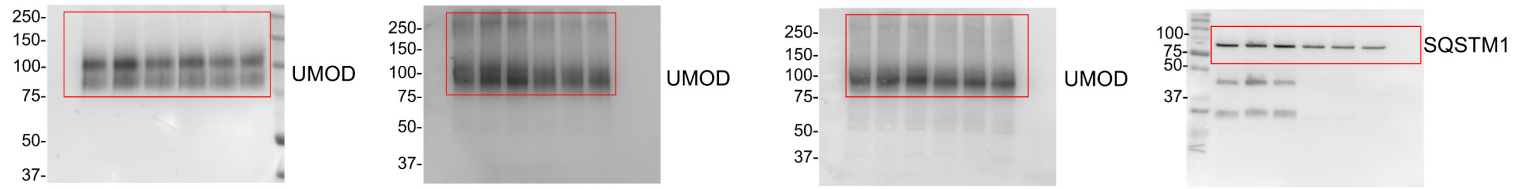

Figure 8D

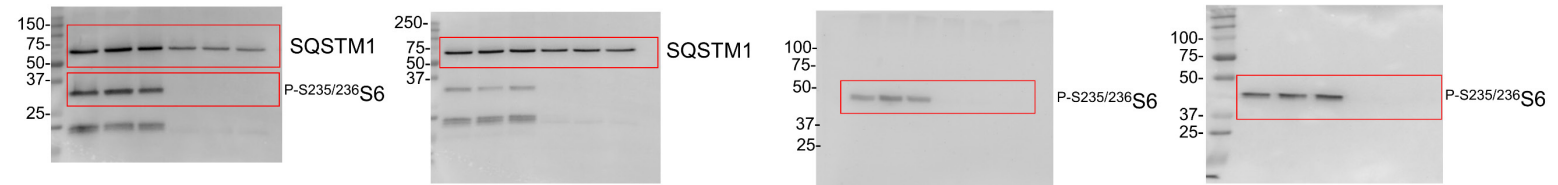

Figure 8D

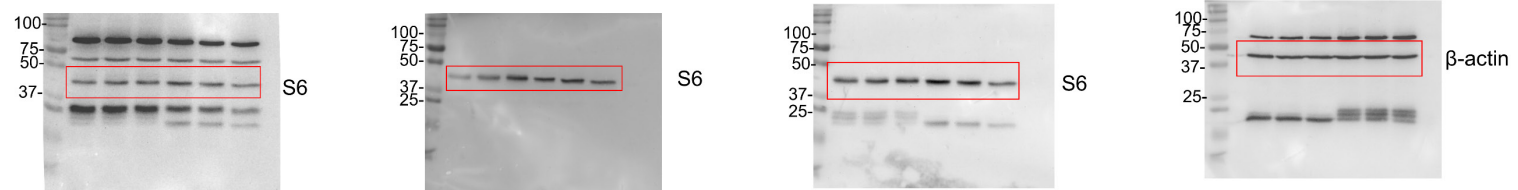

Figure 8D

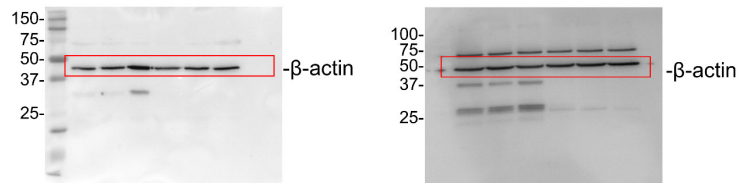

Appendix Figure 16 (continued).

**Appendix Table S1: Clinical characteristics of p. (Arg185Ser) ADTKD-UMOD family.**

|               | <b>Gender</b> | <b>CKD (age)</b> | <b>Kidney failure (age)</b> | <b>Hyperuricemia (age)</b> | <b>Gout (age)</b> |
|---------------|---------------|------------------|-----------------------------|----------------------------|-------------------|
| p.R185S III.1 | F             | Y                | Y (NA)                      | Y                          | Y (40y)           |
| p.R185S III.2 | F             | Y                | Y (50y)                     | NA                         | NA                |
| p.R185S IV.1  | M             | Y                | Y (43y)                     | Y                          | Y                 |
| p.R185S IV.2  | M             | Y (32y)          | Y (36y)                     | Y                          | Y (32y)           |
| p.R185S IV.3  | M             | Y (19y)          | Y (28y)                     | Y                          | Y (9y)            |
| p.R185S IV.4  | F             | Y                | N (41y)                     | Y (34y)                    | N                 |
| p.R185S IV.5  | F             | Y                | Y (38y)                     | Y                          | Y (18y)           |
| p.R185S IV.6  | M             | Y (38y)          | Y (42y)                     | Y                          | Y (26y)           |
| p.R185S V.1   | M             | Y                | N (24y)                     | NA                         | NA                |
| p.R185S V.2   | M             | Y                | N (34y)                     | Y                          | Y (25y)           |

M, male; F, female; Y, yes; N, no; NA, not available; CKD, chronic kidney disease; eGFR, estimated glomerular filtration rate.

**Appendix Table S2: Clinical characteristics of p. (Cys170Tyr) ADTKD-UMOD families.**

| <b>F1</b>     | <b>Gender</b> | <b>CKD (age)</b> | <b>Kidney failure (age)</b> | <b>Hyperuricemia</b> | <b>Gout (age)</b> |
|---------------|---------------|------------------|-----------------------------|----------------------|-------------------|
| p.C170Y I.1   | M             | Y                | Y (63y)                     | Y                    | Y                 |
| p.C170Y II.1  | M             | Y (41y)          | Y (58y; post-nephrectomy)*  | Y                    | Y (55y)           |
| p.C170Y III.1 | F             | Y (43y)          | N                           | Y                    | N                 |
| p.C170Y III.2 | F             | Y                | N (28y)                     | NA                   | NA                |
| p.C170Y IV.1  | F             | N (12y)          | N                           | N                    | N                 |

  

| <b>F2</b>     | <b>Gender</b> | <b>CKD (age)</b> | <b>Kidney failure (age)</b>             | <b>Hyperuricemia</b> | <b>Gout (age)</b> |
|---------------|---------------|------------------|-----------------------------------------|----------------------|-------------------|
| p.C170Y I.1   | M             | Y                | Y (69y)                                 | Y                    | Y                 |
| p.C170Y II.1  | F             | Y                | N<br>(73y: eGFR 33mL/min; 86y: no ESKD) | Y                    | N                 |
| p.C170Y II.2  | F             | Y                | Y (84y)                                 | Y                    | N                 |
| p.C170Y III.1 | F             | Y (33y)          | N (54y)                                 | Y                    | N                 |

M, male; F, female; Y, yes; N, no; NA, not available; CKD, chronic kidney disease; eGFR, estimated glomerular filtration rate.

\* Nephrectomy for clear cell carcinoma – abundant hematuria

**Appendix Table S3: In silico analysis of selected *UMOD* missense variants.**

| Genomic coordinates (GRCh38) | Nucleotide change | Predicted amino acid change | Control & patient databases* | Pathogenicity predictions <sup>‡</sup>                                                                | Comment                                                                                                                                                                                                                       | ACMG classification (PMID 25741868)                   |
|------------------------------|-------------------|-----------------------------|------------------------------|-------------------------------------------------------------------------------------------------------|-------------------------------------------------------------------------------------------------------------------------------------------------------------------------------------------------------------------------------|-------------------------------------------------------|
| 16:20348792:C:T              | c.509G>A          | p.(Cys170Tyr)               | 0 <sup>¶</sup>               | Pathogenic computational verdict (7 path. vs. 4 ben. predictions), REVEL metascore: 0.63 <sup>†</sup> | Not in ClinVar; located between EGF-like 3 domain and D8C UniProt classifies this variant as Pathogenic, associated with Tubulointerstitial kidney disease, autosomal dominant, 1.                                            | <b>Likely Pathogenic (PM2, PP2, PP3, PP5, PP1)</b>    |
| 16:20348748:G:T              | c.553C>A          | p.(Arg185Ser)               | 0                            | Pathogenic computational verdict (9 path. vs. 2 ben. predictions), REVEL metascore: 0.84 <sup>†</sup> | Not in ClinVar; located between EGF-like 3 domain and D8C; inside a mutational hot-spot <sup>#</sup> UniProt classifies this variant as Pathogenic, associated with Tubulointerstitial kidney disease, autosomal dominant, 1. | <b>Pathogenic (PM1, PM5, PM2, PP2, PP3, PP5, PP1)</b> |

UMOD transcript: NM\_001008389.3

\* Includes the Genome Aggregation Database (gnomAD) (Karczewski *et al*, 2020), the UK Biobank (Van Hout *et al*, 2020), the Genomics England 100,000 Genomes Project (Turro *et al*, 2020) and the UK Rare Disease Registry (RaDaR) (<https://ukkidney.org/rare-renal/radar>).

¶ Has been reported before in 1 additional French family with slowly progressive CKD (2 individuals with 72y & 73y not yet in ESKD) (Dahan *et al*, 2003)

‡ Generated using Varsome (Kopanos *et al*, 2019).

† REVEL, rare exome variant ensemble learner (7) (a score > 0.75 corresponds to a sensitivity of ~0.5 and a specificity of ~0.95 for pathogenic variants in the training dataset).

#Hot-spot of length 17 amino-acids has 9 missense/in-frame/non-synonymous variants (5 pathogenic, 3 uncertain, and 1 benign), which qualifies as a dense hot-spot (Ioannidis *et al*, 2016).

Abbreviations: path., pathogenic; ben., benign; EGF-like, epidermal growth factor-like domain; D8C, cysteine-rich domain of unknown function.

**Appendix Table S4: Clinical and biochemical parameters of *Umod*<sup>C171Y</sup> mice.**

| Parameter                                                            | 1 month                           |                                        |                                           | 4 months                          |                                        |                                           |
|----------------------------------------------------------------------|-----------------------------------|----------------------------------------|-------------------------------------------|-----------------------------------|----------------------------------------|-------------------------------------------|
|                                                                      | <i>Umod</i> <sup>+/+</sup><br>n=9 | <i>Umod</i> <sup>C171Y/+</sup><br>n=16 | <i>Umod</i> <sup>C171Y/C171Y</sup><br>n=5 | <i>Umod</i> <sup>+/+</sup><br>n=5 | <i>Umod</i> <sup>C171Y/+</sup><br>n=11 | <i>Umod</i> <sup>C171Y/C171Y</sup><br>n=7 |
| Body weight (BW), g                                                  | 19.7 ± 0.7                        | 20.2 ± 0.6                             | 19.1 ± 1.5                                | 25.6 ± 1.5                        | 28.3 ± 1.0                             | 27.4 ± 1.5                                |
| Water intake, $\mu\text{L}\cdot\text{min}^{-1}\cdot\text{g BW}^{-1}$ | 0.23 ± 0.03                       | 0.27 ± 0.01                            | 0.29 ± 0.02                               | 0.17 ± 0.02                       | 0.14 ± 0.01                            | 0.09 ± 0.02*                              |
| <b>Urine</b>                                                         |                                   |                                        |                                           |                                   |                                        |                                           |
| Diuresis, $\mu\text{L}\cdot\text{min}^{-1}\cdot\text{g BW}^{-1}$     | 0.07 ± 0.02                       | 0.05 ± 0.01                            | 0.04 ± 0.01                               | 0.05 ± 0.01                       | 0.05 ± 0.01                            | 0.05 ± 0.01                               |
| Na <sup>+</sup> , g·g creat <sup>-1</sup>                            | 5.6 ± 0.3                         | 5.7 ± 0.2                              | 7.2 ± 0.7                                 | 4.5 ± 0.6                         | 6.6 ± 0.4*                             | 4.9 ± 0.7                                 |
| K <sup>+</sup> , g·g creat <sup>-1</sup>                             | 19.5 ± 1.0                        | 20.1 ± 0.6                             | 23.6 ± 2.0                                | 15.7 ± 0.9                        | 19.2 ± 1.0                             | 15.7 ± 1.0                                |
| Cl <sup>-</sup> , g·g creat <sup>-1</sup>                            | 14.4 ± 0.8                        | 14.3 ± 0.4                             | 17.9 ± 1.0*                               | 9.8 ± 0.8                         | 12.6 ± 1.0                             | 10.1 ± 0.8                                |
| Ca <sup>2+</sup> , g·g creat <sup>-1</sup>                           | 0.14 ± 0.02                       | 0.14 ± 0.01                            | 0.17 ± 0.02                               | 0.17 ± 0.04                       | 0.09 ± 0.01*                           | 0.17 ± 0.02                               |
| Mg <sup>2+</sup> , g·g creat <sup>-1</sup>                           | 1.32 ± 0.06                       | 1.24 ± 0.08                            | 1.39 ± 0.04                               | 0.95 ± 0.04                       | 1.03 ± 0.03                            | 1.02 ± 0.07                               |
| Creatinine, mg·dL <sup>-1</sup>                                      | 44 ± 3                            | 43 ± 2                                 | 32 ± 3*                                   | 41 ± 5                            | 32 ± 2                                 | 35 ± 5                                    |
| FE <sub>UA</sub> , %                                                 | 1.16 ± 0.26                       | 0.97 ± 0.12                            | 1.41 ± 0.34                               | 0.59 ± 0.11                       | -                                      | -                                         |
| Osmolality, mOsm·kg H <sub>2</sub> O <sup>-1</sup>                   | 1854 ± 85                         | 1816 ± 93                              | 1648 ± 132                                | 1476 ± 184                        | 1364 ± 109                             | 1284 ± 188                                |
| <b>Plasma</b>                                                        |                                   |                                        |                                           |                                   |                                        |                                           |
|                                                                      | n=9                               | n=21                                   | n=9                                       | n=16                              | n=20                                   | n=24                                      |
| Na <sup>+</sup> , mmol·L <sup>-1</sup>                               | 147 ± 2                           | 146 ± 1                                | 148 ± 1                                   | 147 ± 1                           | 149 ± 1                                | 149 ± 1                                   |
| Cl <sup>-</sup> , mmol·L <sup>-1</sup>                               | 108 ± 1                           | 108 ± 2                                | 108 ± 2                                   | 111 ± 1                           | 110 ± 0.8                              | 111 ± 1                                   |
| Ca <sup>2+</sup> , mmol·L <sup>-1</sup>                              | 2.8 ± 0.04                        | 2.8 ± 0.05                             | 2.8 ± 0.6                                 | 2.5 ± 0.05                        | 2.5 ± 0.03                             | 2.50 ± 0.3                                |
| Creatinine, mg·dL <sup>-1</sup>                                      | 0.14 ± 0.02                       | 0.13 ± 0.01                            | 0.15 ± 0.03                               | 0.12 ± 0.01                       | 0.13 ± 0.01                            | 0.15 ± 0.01                               |
| BUN, mg·dL <sup>-1</sup>                                             | 21 ± 2                            | 19 ± 1                                 | 21 ± 1                                    | 20 ± 2                            | 25 ± 1*                                | 29 ± 1***                                 |
| Uric acid, mg·dL <sup>-1</sup>                                       | 6.4 ± 0.4                         | 5.9 ± 0.3                              | 5.2 ± 0.4                                 | 5.2 ± 0.5                         | 4.6 ± 0.4                              | 4.0 ± 0.3                                 |
| Osmolality, mOsm·kg H <sub>2</sub> O <sup>-1</sup>                   | 351 ± 3                           | 343 ± 3                                | 347 ± 4                                   | 335 ± 3                           | 342 ± 2*                               | 343 ± 2                                   |

Values are presented as average ± SEM. \**P* < 0.05, \*\*\**P* < 0.001, versus age matched *Umod*<sup>+/+</sup> mice. n: number of animals, FE<sub>UA</sub>: fractional excretion of uric acid, BUN: blood urea nitrogen.

**Appendix Table S5: Clinical and biochemical parameters of *Umod*<sup>R186S</sup> mice.**

| Parameter                                                            | 1 month                            |                                        |                                            | 4 months                           |                                        |                                           |
|----------------------------------------------------------------------|------------------------------------|----------------------------------------|--------------------------------------------|------------------------------------|----------------------------------------|-------------------------------------------|
|                                                                      | <i>Umod</i> <sup>+/+</sup><br>n=15 | <i>Umod</i> <sup>R186S/+</sup><br>n=18 | <i>Umod</i> <sup>R186S/R186S</sup><br>n=12 | <i>Umod</i> <sup>+/+</sup><br>n=10 | <i>Umod</i> <sup>R186S/+</sup><br>n=13 | <i>Umod</i> <sup>R186S/R186S</sup><br>n=7 |
| Body weight (BW), g                                                  | 16.5 ± 0.6                         | 16.4 ± 0.6                             | 16.4 ± 0.6                                 | 26.3 ± 1.4                         | 23.3 ± 1.0                             | 26.5 ± 0.9                                |
| Water intake, $\mu\text{L}\cdot\text{min}^{-1}\cdot\text{g BW}^{-1}$ | 0.29 ± 0.02                        | 0.27 ± 0.02                            | 0.28 ± 0.03                                | 0.15 ± 0.01                        | 0.31 ± 0.02***                         | 0.44 ± 0.04***                            |
| <b>Urine</b>                                                         |                                    |                                        |                                            |                                    |                                        |                                           |
| Diuresis, $\mu\text{L}\cdot\text{min}^{-1}\cdot\text{g BW}^{-1}$     | 0.041 ± 0.006                      | 0.059 ± 0.009                          | 0.14 ± 0.04*                               | 0.046 ± 0.007                      | 0.12 ± 0.01***                         | 0.23 ± 0.02***                            |
| Na <sup>+</sup> , g·g creat <sup>-1</sup>                            | 5.8 ± 0.6                          | 6.3 ± 0.7                              | 6.4 ± 0.8                                  | 5.6 ± 0.3                          | 5.7 ± 0.5                              | 4.7 ± 0.6                                 |
| K <sup>+</sup> , g·g creat <sup>-1</sup>                             | 27.7 ± 1.3                         | 23.8 ± 0.9*                            | 27.06 ± 1.1                                | 19.7 ± 1.2                         | 21.4 ± 1.16                            | 19.4 ± 0.6                                |
| Cl <sup>-</sup> , g·g creat <sup>-1</sup>                            | 19.8 ± 1.2                         | 17.5 ± 1.0                             | 21.3 ± 1.1                                 | 14.5 ± 1.1                         | 15.9 ± 1.0                             | 14.2 ± 0.7                                |
| Ca <sup>2+</sup> , g·g creat <sup>-1</sup>                           | 0.15 ± 0.02                        | 0.28 ± 0.04*                           | 0.24 ± 0.03*                               | 0.08 ± 0.07                        | 0.21 ± 0.02#                           | 0.20 ± 0.03***                            |
| Mg <sup>2+</sup> , g·g creat <sup>-1</sup>                           | 2.2 ± 0.9                          | 2.0 ± 0.1                              | 2.3 ± 0.1                                  | 1.3 ± 0.1                          | 1.41 ± 0.13                            | 1.65 ± 0.08                               |
| Creatinine, mg·dL <sup>-1</sup>                                      | 43 ± 3                             | 34 ± 3                                 | 29 ± 3**                                   | 50 ± 2                             | 25 ± 2#                                | 15 ± 1#                                   |
| FE <sub>UA</sub> , %                                                 | 1.16 ± 0.26                        | 1.18 ± 0.31                            | 0.72 ± 0.36                                | 0.25 ± 0.1                         | 0.74 ± 0.4***                          | 0.16 ± 0.05**                             |
| Osmolality, mOsm·kg H <sub>2</sub> O <sup>-1</sup>                   | 2227 ± 186                         | 1647 ± 168*                            | 1440 ± 152**                               | 2012 ± 132                         | 958 ± 58#                              | 583 ± 20#                                 |
| <b>Plasma</b>                                                        |                                    |                                        |                                            |                                    |                                        |                                           |
| Na <sup>+</sup> , mmol·L <sup>-1</sup>                               | n=9                                | n=6                                    | n=13                                       | n=23                               | n=24                                   | n=14                                      |
| Na <sup>+</sup> , mmol·L <sup>-1</sup>                               | 149 ± 2                            | 149 ± 1                                | 149 ± 1                                    | 147 ± 1                            | 149 ± 1*                               | 153 ± 1***                                |
| Cl <sup>-</sup> , mmol·L <sup>-1</sup>                               | 109 ± 1                            | 109 ± 1                                | 108 ± 1                                    | 119 ± 1                            | 108 ± 1                                | 107 ± 1*                                  |
| Ca <sup>2+</sup> , mmol·L <sup>-1</sup>                              | 2.72 ± 0.05                        | 2.63 ± 0.06                            | 2.64 ± 0.06                                | 2.50 ± 0.03                        | 2.51 ± 0.03                            | 2.65 ± 0.04*                              |
| Creatinine, mg·dL <sup>-1</sup>                                      | 0.17 ± 0.04                        | 0.12 ± 0.01                            | 0.15 ± 0.01                                | 0.11 ± 0.01                        | 0.14 ± 0.01*                           | 0.18 ± 0.01***                            |
| BUN, mg·dL <sup>-1</sup>                                             | 19 ± 1                             | 33 ± 4***                              | 43 ± 4#                                    | 21 ± 1                             | 55 ± 2#                                | 70 ± 2#                                   |
| Uric acid, mg·dL <sup>-1</sup>                                       | 6.6 ± 0.7                          | 5.2 ± 1.1                              | 5.9 ± 0.5                                  | 5.4 ± 0.3                          | 4.8 ± 0.4                              | 5.1 ± 0.8                                 |
| Osmolality, mOsm·kg H <sub>2</sub> O <sup>-1</sup>                   | 353 ± 4                            | 351 ± 4                                | 356 ± 3                                    | 340 ± 2                            | 355 ± 2#                               | 366 ± 3#                                  |

Values are presented as average ± SEM. \* $P < 0.05$ , \*\* $P < 0.01$ , \*\*\* $P < 0.001$ , # $P < 0.0001$  versus age matched *Umod*<sup>+/+</sup> mice. n: number of animals, FE<sub>UA</sub>: fractional excretion of uric acid, BUN: blood urea nitrogen.

**Appendix Table S6: Clinical and biochemical parameters of *Umod*<sup>R186S/-</sup> mice.**

| Parameter                                              | 1 month                            |                                        |                                       | 4 months                          |                                       |                                        |
|--------------------------------------------------------|------------------------------------|----------------------------------------|---------------------------------------|-----------------------------------|---------------------------------------|----------------------------------------|
|                                                        | <i>Umod</i> <sup>+/+</sup><br>n=11 | <i>Umod</i> <sup>R186S/+</sup><br>n=10 | <i>Umod</i> <sup>R186S/-</sup><br>n=9 | <i>Umod</i> <sup>+/+</sup><br>n=8 | <i>Umod</i> <sup>R186S/+</sup><br>n=7 | <i>Umod</i> <sup>R186S/-</sup><br>n=13 |
| Body weight (BW), g                                    | 16.1 ± 0.7                         | 15.6 ± 0.6                             | 16.6 ± 0.6                            | 29.2 ± 1.7                        | 26.6 ± 1.3                            | 29.4 ± 0.6                             |
| Water intake, μL·min <sup>-1</sup> ·g BW <sup>-1</sup> | 0.36 ± 0.03                        | 0.30 ± 0.01                            | 0.33 ± 0.02                           | 0.15 ± 0.02                       | 0.29 ± 0.02***                        | 0.25 ± 0.02**                          |
| <b>Urine</b>                                           |                                    |                                        |                                       |                                   |                                       |                                        |
| Diuresis, μL·min <sup>-1</sup> ·g BW <sup>-1</sup>     | 0.048 ± 0.008                      | 0.057 ± 0.009                          | 0.04 ± 0.01                           | 0.03 ± 0.01                       | 0.13 ± 0.02***                        | 0.11 ± 0.01#                           |
| Na <sup>+</sup> , g·g creat <sup>-1</sup>              | 8.3 ± 0.5                          | 9.0 ± 0.4                              | 9.0 ± 0.6                             | 3.2 ± 0.5                         | 4.0 ± 0.3                             | 3.9 ± 0.3                              |
| K <sup>+</sup> , g·g creat <sup>-1</sup>               | 27.8 ± 0.9                         | 30.0 ± 0.8                             | 30.8 ± 1.4                            | 18.7 ± 1.2                        | 19.1 ± 1.2                            | 18.5 ± 0.8                             |
| Cl <sup>-</sup> , g·g creat <sup>-1</sup>              | 23.9 ± 0.8                         | 25.5 ± 1.0                             | 26.3 ± 1.4                            | 10.8 ± 0.4                        | 12.4 ± 1.0                            | 11.6 ± 0.8                             |
| Ca <sup>2+</sup> , g·g creat <sup>-1</sup>             | 0.23 ± 0.03                        | 0.27 ± 0.02                            | 0.28 ± 0.03                           | 0.14 ± 0.02                       | 0.22 ± 0.01**                         | 0.22 ± 0.01**                          |
| Mg <sup>2+</sup> , g·g creat <sup>-1</sup>             | 2.0 ± 0.2                          | 2.2 ± 0.1                              | 2.2 ± 0.2                             | 1.2 ± 0.1                         | 1.43 ± 0.07                           | 1.32 ± 0.09                            |
| Creatinine, mg·dL <sup>-1</sup>                        | 35.2 ± 3.0                         | 30.7 ± 1.4                             | 37.2 ± 4.1                            | 44.2 ± 5.5                        | 21.7 ± 2.3**                          | 20.3 ± 1.1#                            |
| FE <sub>UA</sub> , %                                   | -                                  | -                                      | -                                     | 0.55 ± 0.09                       | 0.14 ± 0.02**                         | 0.16 ± 0.03**                          |
| Osmolality, mOsm·kg H <sub>2</sub> O <sup>-1</sup>     | 1855 ± 120                         | 1766 ± 81                              | 2091 ± 217                            | 1577 ± 201                        | 771 ± 42**                            | 731 ± 29#                              |
| <b>Plasma</b>                                          |                                    |                                        |                                       |                                   |                                       |                                        |
|                                                        | n=13                               | n=10                                   | n=11                                  | n=14                              | n=15                                  | n=20                                   |
| Na <sup>+</sup> , mmol·L <sup>-1</sup>                 | 145.9 ± 0.8                        | 145.3 ± 0.8                            | 145.1 ± 0.7                           | 147.3 ± 0.7                       | 149.1 ± 0.5*                          | 148.2 ± 0.5                            |
| Cl <sup>-</sup> , mmol·L <sup>-1</sup>                 | 107.8 ± 0.7                        | 107.1 ± 0.5                            | 110.3 ± 0.9                           | 110.0 ± 1.1                       | 107.1 ± 0.7*                          | 106.6 ± 0.3**                          |
| Ca <sup>2+</sup> , mmol·L <sup>-1</sup>                | 2.67 ± 0.07                        | 2.82 ± 0.05                            | 2.77 ± 0.05                           | 2.46 ± 0.05                       | 2.62 ± 0.03**                         | 2.62 ± 0.03**                          |
| Creatinine, mg·dL <sup>-1</sup>                        | 0.15 ± 0.02                        | 0.142 ± 0.02                           | 0.17 ± 0.03                           | 0.10 ± 0.02                       | 0.17 ± 0.02*                          | 0.16 ± 0.01*                           |
| BUN, mg·dL <sup>-1</sup>                               | 19 ± 1                             | 32 ± 2#                                | 32 ± 1.#                              | 20 ± 1.0                          | 53 ± 4 #                              | 56 ± 1.#                               |
| Uric acid, mg·dL <sup>-1</sup>                         | 3.3 ± 0.5                          | 4.0 ± 0.9                              | 4.8 ± 0.5                             | 4.1 ± 0.3                         | 4.1 ± 0.4                             | 3.8 ± 0.4                              |
| Osmolality, mOsm·kg H <sub>2</sub> O <sup>-1</sup>     | 341 ± 4                            | 353 ± 3                                | 355 ± 4*                              | 338 ± 3                           | 353 ± 3**                             | 357 ± 3#                               |

Values are presented as average ± SEM. \**P* < 0.05, \*\**P* < 0.01, \*\*\**P* < 0.001, #*P* < 0.0001 versus age-matched *Umod*<sup>+/+</sup> mice or † *P* ≤ 0.05 versus age-matched *Umod*<sup>R186S/+</sup> mice. n: number of animals, FE<sub>UA</sub>: fractional excretion of uric acid, BUN: blood urea nitrogen.

**Appendix Table S7: Clinical and biological parameters of 4-month *Umod* KI mice per gender.**

|                                                    | Female                             |                                        |                                            | Male                              |                                       |                                           |
|----------------------------------------------------|------------------------------------|----------------------------------------|--------------------------------------------|-----------------------------------|---------------------------------------|-------------------------------------------|
| <b>Plasma</b>                                      | <i>Umod</i> <sup>+/+</sup><br>n=10 | <i>Umod</i> <sup>C171Y/+</sup><br>n=12 | <i>Umod</i> <sup>C171Y/C171Y</sup><br>n=17 | <i>Umod</i> <sup>+/+</sup><br>n=5 | <i>Umod</i> <sup>C171Y/+</sup><br>n=8 | <i>Umod</i> <sup>C171Y/C171Y</sup><br>n=7 |
| BUN, mg·dL <sup>-1</sup>                           | 18 ± 2                             | 23 ± 1                                 | 27 ± 2**                                   | 19 ± 2                            | 28 ± 2*                               | 36 ± 2***                                 |
| <b>Urine</b>                                       | <i>Umod</i> <sup>+/+</sup><br>n=5  | <i>Umod</i> <sup>R186S/+</sup><br>n=9  | <i>Umod</i> <sup>R186S/R186S</sup><br>n=3  | <i>Umod</i> <sup>+/+</sup><br>n=5 | <i>Umod</i> <sup>R186S/+</sup><br>n=4 | <i>Umod</i> <sup>R186S/R186S</sup><br>n=4 |
| Diuresis, μL·min <sup>-1</sup> ·g BW <sup>-1</sup> | 0.05 ± 0.01                        | 0.11 ± 0.02 <sup>a</sup>               | 0.3 ± 0.00 <sup>a</sup>                    | 0.04 ± 0.01                       | 0.14 ± 0.01**                         | 0.21 ± 0.02#                              |
| Osmolality, mOsm·kg H <sub>2</sub> O <sup>-1</sup> | 2087 ± 246                         | 950 ± 87***                            | 564 ± 50***                                | 1936 ± 157                        | 974 ± 47***                           | 598 ± 17#                                 |
| <b>Plasma</b>                                      | n=17                               | n=14                                   | n=7                                        | n=7                               | n=11                                  | n=7                                       |
| Creatinine, mg·dL <sup>-1</sup>                    | 0.10 ± 0.01 <sup>b</sup>           | 0.18 ± 0.01 <sup>c#</sup>              | 0.21 ± 0.02#                               | 0.14 ± 0.02                       | 0.10 ± 0.02 <sup>c</sup>              | 0.156 ± 0.004                             |
| BUN, mg·dL <sup>-1</sup>                           | 19 ± 1                             | 53 ± 3#                                | 71 ± 3#                                    | 25 ± 1                            | 58 ± 3#                               | 70 ± 3#                                   |
| <b>Urine</b>                                       | <i>Umod</i> <sup>+/+</sup><br>n=5  | <i>Umod</i> <sup>R186S/+</sup><br>n=9  | <i>Umod</i> <sup>R186S/R186S</sup><br>n=3  | <i>Umod</i> <sup>+/+</sup><br>n=5 | <i>Umod</i> <sup>R186S/+</sup><br>n=4 | <i>Umod</i> <sup>R186S/R186S</sup><br>n=4 |
| Diuresis, μL·min <sup>-1</sup> ·g BW <sup>-1</sup> | 0.008 ± 0.001                      | 0.13 ± 0.06                            | 0.14 ± 0.03                                | 0.04 ± 0.02                       | 0.13 ± 0.02**                         | 0.10 ± 0.01**                             |
| Osmolality, mOsm·kg H <sub>2</sub> O <sup>-1</sup> | 2046 ± 438                         | 752 ± 64                               | 701 ± 89                                   | 1296 ± 140                        | 778 ± 62***                           | 736 ± 31#                                 |
| <b>Plasma</b>                                      | n=6                                | n=6                                    | n=10                                       | n=8                               | n=9                                   | n=10                                      |
| Creatinine, mg·dL <sup>-1</sup>                    | 0.10 ± 0.03 <sup>d</sup>           | 0.17 ± 0.02                            | 0.17 ± 0.02                                | 0.10 ± 0.03 <sup>d</sup>          | 0.17 ± 0.03 <sup>d</sup>              | 0.15 ± 0.02                               |
| BUN, mg·dL <sup>-1</sup>                           | 18 ± 1                             | 54 ± 4#                                | 56 ± 4#                                    | 22 ± 1                            | 52 ± 6#                               | 56 ± 2#                                   |

Values are presented as average ± SEM. One-way ANOVA with Tukey's post hoc per gender. \**P*<0.05, \*\**P*<0.01, \*\*\**P*<0.001, #*P*<0.0001 versus gender-matched *Umod*<sup>+/+</sup> mice, n: number of animals, BUN: blood urea nitrogen. <sup>a</sup>2 samples were not available for analysis, <sup>b</sup>3 samples were undetectable. <sup>c</sup>1 sample was undetectable, <sup>d</sup>2 samples were undetectable.



**Appendix Table S8: Top 50 DEGs in *Umod*<sup>R186S/+</sup> kidneys at 1 month.**

| Symbol               | Gene name                                                                                         | Fold change (log2) | FDR (-log10) |
|----------------------|---------------------------------------------------------------------------------------------------|--------------------|--------------|
| <i>Lcn2</i>          | Lipocalin 2                                                                                       | 4.09               | 100.44       |
| <i>Atf5</i>          | Activating transcription factor 5                                                                 | 2.61               | 52.02        |
| <i>Trib3</i>         | Tribbles pseudokinase 3                                                                           | 4.04               | 37.43        |
| <i>Asns</i>          | Asparagine synthetase                                                                             | 2.39               | 33.55        |
| <i>Mthfd2</i>        | Methylenetetrahydrofolate dehydrogenase (NAD+ dependent), methenyltetrahydrofolate cyclohydrolase | 2.31               | 27.30        |
| <i>Akr1b8</i>        | Aldo-keto reductase family 1, member B8                                                           | 2.21               | 20.17        |
| <i>Cxcl10</i>        | Chemokine (C-X-C motif) ligand 10                                                                 | 2.92               | 19.70        |
| <i>Stc2</i>          | Stanniocalcin 2                                                                                   | 2.29               | 19.52        |
| <i>Aldh18a1</i>      | Aldehyde dehydrogenase 18 family, member A1                                                       | 2.08               | 18.88        |
| <i>Angptl6</i>       | Angiopoietin-like 6                                                                               | 2.33               | 14.69        |
| <i>Aldh1l2</i>       | Aldehyde dehydrogenase 1 family, member L2                                                        | 1.87               | 14.36        |
| <i>Slc7a11</i>       | Solute carrier family 7 (cationic amino acid transporter, y+ system), member 11                   | 2.56               | 13.53        |
| <i>Mt2</i>           | Metallothionein 2                                                                                 | 1.76               | 13.17        |
| <i>Slc7a3</i>        | Solute carrier family 7 (cationic amino acid transporter, y+ system), member 3                    | 2.62               | 12.81        |
| <i>Nupr1</i>         | Nuclear protein transcription regulator 1                                                         | 1.45               | 12.61        |
| <i>Cbr3</i>          | Carbonyl reductase 3                                                                              | 2.15               | 12.12        |
| <i>Arhgap36</i>      | Rho GTPase activating protein 36                                                                  | 2.76               | 11.99        |
| <i>Soat2</i>         | Sterol O-acyltransferase 2                                                                        | 2.56               | 11.48        |
| <i>Pappa</i>         | Pregnancy-associated plasma protein A                                                             | 1.91               | 11.33        |
| <i>Slc38a1</i>       | Solute carrier family 38, member 1                                                                | 1.40               | 11.25        |
| <i>Wnt10a</i>        | Wingless-type MMTV integration site family, member 10A                                            | 2.65               | 10.75        |
| <i>Gabrp</i>         | Gamma-aminobutyric acid (GABA) A receptor, pi                                                     | 2.51               | 10.74        |
| <i>Loxl4</i>         | Lysyl oxidase-like 4                                                                              | 1.66               | 9.76         |
| <i>Lgals3</i>        | Lectin, galactose binding, soluble 3                                                              | 1.24               | 9.48         |
| <i>Fam129a</i>       | Family with sequence similarity 129, member A                                                     | 1.32               | 8.13         |
| <i>Egf</i>           | Epidermal growth factor                                                                           | -2.00              | 40.86        |
| <i>Umod</i>          | Uromodulin                                                                                        | -1.74              | 24.75        |
| <i>Car3</i>          | Carbonic anhydrase 3                                                                              | -2.01              | 14.36        |
| <i>Gm36797</i>       | Predicted gene, 36797                                                                             | -2.65              | 13.46        |
| <i>Gm32960</i>       | Predicted gene, 32960                                                                             | -1.74              | 13.17        |
| <i>Kcnt1</i>         | Potassium channel, subfamily T, member 1                                                          | -1.87              | 9.55         |
| <i>Wfdc15b</i>       | WAP four-disulfide core domain 15B                                                                | -1.23              | 7.59         |
| <i>Azgp1</i>         | Aalpha-2-glycoprotein 1, zinc                                                                     | -1.47              | 6.76         |
| <i>Dusp15</i>        | Dual specificity phosphatase-like 15                                                              | -1.46              | 6.47         |
| <i>Cyp2a4</i>        | Cytochrome P450, family 2, subfamily a, polypeptide 4                                             | -1.04              | 6.32         |
| <i>Slc6a6</i>        | Solute carrier family 6 (neurotransmitter transporter, taurine), member 6                         | -0.63              | 5.88         |
| <i>Atp8b4</i>        | ATPase, class I, type 8B, member 4                                                                | -1.56              | 5.67         |
| <i>Fam107a</i>       | Family with sequence similarity 107, member A                                                     | -0.99              | 5.53         |
| <i>Slco1a6</i>       | Solute carrier organic anion transporter family, member 1a6                                       | -0.74              | 4.95         |
| <i>Tmem207</i>       | Transmembrane protein 207                                                                         | -1.39              | 4.87         |
| <i>BC040756</i>      | cDNA sequence BC040756                                                                            | -0.87              | 4.74         |
| <i>Pex5l</i>         | Peroxisomal biogenesis factor 5-like                                                              | -1.48              | 4.49         |
| <i>Esrrb</i>         | Estrogen related receptor, beta                                                                   | -0.97              | 4.49         |
| <i>Cwh43</i>         | Cell wall biogenesis 43 C-terminal homolog                                                        | -0.78              | 4.49         |
| <i>6330410L21Rik</i> | RIKEN cDNA 6330410L21 gene                                                                        | -1.35              | 4.41         |
| <i>Ugt8a</i>         | UDP galactosyltransferase 8A                                                                      | -0.85              | 4.41         |
| <i>Omd</i>           | Osteomodulin                                                                                      | -1.12              | 4.19         |
| <i>Rnf169</i>        | Ring finger protein 169                                                                           | -0.88              | 4.18         |
| <i>Dok2</i>          | Docking protein 2                                                                                 | -1.13              | 4.13         |
| <i>Per1</i>          | PPARGC1 and ESRR induced regulator, muscle 1                                                      | -1.36              | 4.09         |

FDR: False discovery rate-adjusted *P* value (Benjamini-Hochberg correction).

**Appendix Table S9: Top 50 DEGs in *Umod*<sup>R186S/+</sup> kidneys at 4 months.**

| Symbol               | Gene name                                                                                         | Fold change (log2) | FDR (-log10) |
|----------------------|---------------------------------------------------------------------------------------------------|--------------------|--------------|
| <i>Lcn2</i>          | Lipocalin 2                                                                                       | 4.23               | 114.29       |
| <i>Arhgap36</i>      | Rho GTPase activating protein 36                                                                  | 6.04               | 66.64        |
| <i>Slc7a11</i>       | Solute carrier family 7 (cationic amino acid transporter, y+ system), member 11                   | 4.91               | 53.68        |
| <i>Akr1b8</i>        | Aldo-keto reductase family 1, member B8                                                           | 3.36               | 52.89        |
| <i>Nefl</i>          | Neurofilament, light polypeptide                                                                  | 3.98               | 52.36        |
| <i>Dpt</i>           | Dermatopontin                                                                                     | 3.03               | 49.97        |
| <i>Cbr3</i>          | Carbonyl reductase 3                                                                              | 4.02               | 47.22        |
| <i>Atf5</i>          | Activating transcription factor 5                                                                 | 2.38               | 44.14        |
| <i>Ppp2r2c</i>       | Protein phosphatase 2, regulatory subunit B, gamma                                                | 4.49               | 37.30        |
| <i>Trib3</i>         | Tribbles pseudokinase 3                                                                           | 3.78               | 34.16        |
| <i>B4galnt2</i>      | Beta-1,4-N-acetyl-galactosaminyl transferase 2                                                    | 3.78               | 32.79        |
| <i>Aldh18a1</i>      | Aldehyde dehydrogenase 18 family, member A1                                                       | 2.62               | 30.76        |
| <i>Asns</i>          | Asparagine synthetase                                                                             | 2.14               | 28.48        |
| <i>Stc2</i>          | Stanniocalcin 2                                                                                   | 2.84               | 26.86        |
| <i>Gabrp</i>         | Gamma-aminobutyric acid (GABA) A receptor, pi                                                     | 3.51               | 23.20        |
| <i>Aldh1l2</i>       | Aldehyde dehydrogenase 1 family, member L2                                                        | 2.25               | 22.19        |
| <i>Abcc3</i>         | ATP-binding cassette, sub-family C (CFTR/MRP), member 3                                           | 2.21               | 21.80        |
| <i>Smoc2</i>         | SPARC related modular calcium binding 2                                                           | 2.04               | 21.77        |
| <i>Astn2</i>         | Astrotactin 2                                                                                     | 2.22               | 21.40        |
| <i>Fcrls</i>         | Fc receptor-like 5, scavenger receptor                                                            | 3.50               | 20.52        |
| <i>Kif1a</i>         | Kinesin family member 1A                                                                          | 2.90               | 20.50        |
| <i>Lyz2</i>          | Lysozyme 2                                                                                        | 1.98               | 20.30        |
| <i>Gm32857</i>       | Predicted gene, 32857                                                                             | 3.62               | 20.28        |
| <i>Mrc1</i>          | Mannose receptor, C type 1                                                                        | 1.89               | 20.28        |
| <i>Mthfd2</i>        | Methylenetetrahydrofolate dehydrogenase (NAD+ dependent), methenyltetrahydrofolate cyclohydrolase | 1.92               | 19.46        |
| <i>Egf</i>           | Epidermal growth factor                                                                           | -3.30              | 115.22       |
| <i>Gpx6</i>          | Glutathione peroxidase 6                                                                          | -2.57              | 58.29        |
| <i>Kcnt1</i>         | Potassium channel, subfamily T, member 1                                                          | -4.04              | 45.73        |
| <i>Umod</i>          | Uromodulin                                                                                        | -2.13              | 38.09        |
| <i>Wfdc15b</i>       | WAP four-disulfide core domain 15B                                                                | -2.21              | 28.02        |
| <i>Tmem207</i>       | Transmembrane protein 207                                                                         | -2.62              | 20.68        |
| <i>Aldoc</i>         | Aldolase C, fructose-bisphosphate                                                                 | -1.67              | 17.42        |
| <i>Dusp15</i>        | Dual specificity phosphatase-like 15                                                              | -2.27              | 15.75        |
| <i>Gm36797</i>       | Predicted gene, 36797                                                                             | -2.76              | 14.99        |
| <i>Gm32960</i>       | Predicted gene, 32960                                                                             | -1.76              | 14.00        |
| <i>Ppp1r1a</i>       | Protein phosphatase 1, regulatory inhibitor subunit 1A                                            | -1.13              | 13.72        |
| <i>Pex5l</i>         | Peroxisomal biogenesis factor 5-like                                                              | -2.36              | 12.85        |
| <i>Perm1</i>         | PPARGC1 and ESRR induced regulator, muscle 1                                                      | -2.21              | 12.77        |
| <i>Lrrc66</i>        | Leucine rich repeat containing 66                                                                 | -1.65              | 12.49        |
| <i>Ckb</i>           | Creatine kinase, brain                                                                            | -1.36              | 11.45        |
| <i>Ank2</i>          | Ankyrin 2, brain                                                                                  | -1.18              | 10.87        |
| <i>Mfsd4a</i>        | Major facilitator superfamily domain containing 4A                                                | -1.10              | 10.75        |
| <i>6330410L21Rik</i> | RIKEN cDNA 6330410L21 gene                                                                        | -2.09              | 10.48        |
| <i>Pcsk6</i>         | Proprotein convertase subtilisin/kexin type 6                                                     | -1.27              | 10.45        |
| <i>Slc6a12</i>       | Solute carrier family 6 (neurotransmitter transporter, betaine/GABA), member 12                   | -1.90              | 9.48         |
| <i>Spag5</i>         | Sperm associated antigen 5                                                                        | -1.78              | 9.48         |
| <i>Cicnka</i>        | Chloride channel, voltage-sensitive Ka                                                            | -1.29              | 9.46         |
| <i>Gcgr</i>          | Glucagon receptor                                                                                 | -1.19              | 9.23         |
| <i>Pla1a</i>         | Phospholipase A1 member A                                                                         | -1.00              | 8.76         |
| <i>Aqp4</i>          | Aquaporin 4                                                                                       | -1.37              | 8.33         |

FDR: False discovery rate-adjusted *P* value (Benjamini-Hochberg correction).

**Appendix Table S10: Top 50 DEGs in *Umod*<sup>C171Y/+</sup> kidneys at 4 months.**

| Symbol               | Gene name                                                                 | Fold change (log2) | FDR (-log10) |
|----------------------|---------------------------------------------------------------------------|--------------------|--------------|
| <i>Jun</i>           | Jun proto-oncogene                                                        | 2.86               | 23.00        |
| <i>Btg2</i>          | BTG anti-proliferation factor 2                                           | 2.72               | 22.27        |
| <i>Ccn1</i>          | Cellular communication network factor 1                                   | 3.29               | 18.39        |
| <i>Fos</i>           | FBJ osteosarcoma oncogene                                                 | 3.38               | 16.46        |
| <i>Ier2</i>          | Immediate early response 2                                                | 2.68               | 15.92        |
| <i>Zfp36</i>         | Zinc finger protein 36                                                    | 1.96               | 13.97        |
| <i>Nr4a2</i>         | Nuclear receptor subfamily 4, group A, member 2                           | 2.94               | 13.51        |
| <i>Ier3</i>          | Immediate early response 3                                                | 2.15               | 13.47        |
| <i>Nr4a1</i>         | Nuclear receptor subfamily 4, group A, member 1                           | 2.79               | 10.13        |
| <i>Fosb</i>          | FBJ osteosarcoma oncogene B                                               | 2.03               | 6.90         |
| <i>Snord14e</i>      | Small nucleolar RNA, C/D box 14 <sup>e</sup>                              | 1.77               | 6.43         |
| <i>Csmp1</i>         | Cysteine-serine-rich nuclear protein 1                                    | 1.65               | 6.32         |
| <i>Gdf15</i>         | Growth differentiation factor 15                                          | 1.87               | 6.32         |
| <i>Ccn2</i>          | Cellular communication network factor 2                                   | 1.18               | 6.18         |
| <i>Gm30591</i>       | Predicted gene, 30591                                                     | 2.09               | 5.88         |
| <i>Tob1</i>          | Transducer of ErbB-2.1                                                    | 1.14               | 5.47         |
| <i>Egr1</i>          | Early growth response 1                                                   | 1.94               | 4.77         |
| <i>Gm17971</i>       | Predicted gene, 17971                                                     | 1.28               | 4.69         |
| <i>Snord14d</i>      | Small nucleolar RNA, C/D box 14D                                          | 1.77               | 4.11         |
| <i>Egr3</i>          | Early growth response 3                                                   | 1.76               | 3.99         |
| <i>Rasd1</i>         | RAS, dexamethasone-induced 1                                              | 1.29               | 3.68         |
| <i>Dusp6</i>         | Dual specificity phosphatase 6                                            | 1.17               | 3.67         |
| <i>Ighv5-9</i>       | Immunoglobulin heavy variable 5-9                                         | 1.47               | 3.31         |
| <i>Ch25h</i>         | Cholesterol 25-hydroxylase                                                | 1.68               | 3.27         |
| <i>Ighg2b</i>        | Immunoglobulin heavy constant gamma 2B                                    | 1.70               | 2.93         |
| <i>mt-T11</i>        | tRNA leucine 1, mitochondrial                                             | -1.21              | 4.57         |
| <i>Gm30238</i>       | predicted gene, 30238                                                     | -1.60              | 3.27         |
| <i>Igkv13-85</i>     | immunoglobulin kappa chain variable 13-85                                 | -1.12              | 2.21         |
| <i>Cyp2d26</i>       | cytochrome P450, family 2, subfamily d, polypeptide 26                    | -1.32              | 2.16         |
| <i>Lpl</i>           | lipoprotein lipase                                                        | -1.38              | 2.14         |
| <i>Synpr</i>         | synaptoporin                                                              | -1.30              | 2.06         |
| <i>Mir6236</i>       | microRNA 6236                                                             | -1.51              | 2.05         |
| <i>1700067K01Rik</i> | RIKEN cDNA 1700067K01 gene                                                | -1.01              | 1.91         |
| <i>Atp1a2</i>        | ATPase, Na <sup>+</sup> /K <sup>+</sup> transporting, alpha 2 polypeptide | -1.20              | 1.82         |
| <i>Itih1</i>         | inter-alpha trypsin inhibitor, heavy chain 1                              | -1.09              | 1.76         |
| <i>Apoc1</i>         | apolipoprotein C-I                                                        | -1.04              | 1.55         |
| <i>Adig</i>          | adipogenin                                                                | -0.91              | 5.38         |
| <i>Slc5a1</i>        | solute carrier family 5 (sodium/glucose cotransporter), member 1          | -0.64              | 3.17         |
| <i>Rn18s-rs5</i>     | 18s RNA, related sequence 5                                               | -0.94              | 2.83         |
| <i>LOC108167485</i>  | putative uncharacterized protein FLJ37770 pseudogene                      | -0.87              | 2.11         |
| <i>Gm17597</i>       | predicted gene, 17597                                                     | -0.83              | 2.11         |
| <i>Mri1</i>          | methylthioribose-1-phosphate isomerase 1                                  | -0.51              | 1.92         |
| <i>Gm34472</i>       | predicted gene, 34472                                                     | -0.91              | 1.73         |
| <i>Gm28023</i>       | predicted gene, 28023                                                     | -0.65              | 1.56         |
| <i>Tcf24</i>         | transcription factor 24                                                   | -0.58              | 1.37         |
| <i>Ugt3a1</i>        | UDP glycosyltransferases 3 family, polypeptide A1                         | -0.39              | 1.29         |
| <i>Cfd</i>           | complement factor D (adipsin)                                             | -1.26              | 1.25         |
| <i>AI429214</i>      | expressed sequence AI429214                                               | -0.75              | 1.25         |
| <i>AA536875</i>      | expressed sequence AA536875                                               | -0.92              | 1.15         |
| <i>Gm15564</i>       | predicted gene 15564                                                      | -1.22              | 1.15         |

FDR: False discovery rate-adjusted *P* value (Benjamini-Hochberg correction).

**Appendix Table S11: Top 50 DEGs in *Umod*<sup>R186S/+</sup> compared to *Umod*<sup>C171Y/+</sup> kidneys at 1 month.**

| Symbol           | Gene name                                                                                          | Fold change (log2) | FDR (-log10) |
|------------------|----------------------------------------------------------------------------------------------------|--------------------|--------------|
| <i>Lcn2</i>      | Lipocalin 2                                                                                        | 4.16               | 99.72        |
| <i>Atf5</i>      | Activating transcription factor 5                                                                  | 2.67               | 53.11        |
| <i>Asns</i>      | Asparagine synthetase                                                                              | 2.36               | 32.01        |
| <i>Trib3</i>     | Tribbles pseudokinase 3                                                                            | 3.65               | 30.80        |
| <i>Mthfd2</i>    | Methylenetetrahydrofolate dehydrogenase (NAD+ dependent), methenyltetrahydrofolate cyclohydrolase  | 2.28               | 26.20        |
| <i>Stc2</i>      | Stanniocalcin 2                                                                                    | 2.45               | 21.46        |
| <i>Akr1b8</i>    | Aldo-keto reductase family 1, member B8                                                            | 2.29               | 21.33        |
| <i>Cxcl10</i>    | Chemokine (C-X-C motif) ligand 10                                                                  | 2.94               | 19.82        |
| <i>Aldh18a1</i>  | Aldehyde dehydrogenase 18 family, member A1                                                        | 2.16               | 19.82        |
| <i>Cbr3</i>      | Carbonyl reductase 3                                                                               | 2.45               | 14.95        |
| <i>Arhgap36</i>  | Rho GTPase activating protein 36                                                                   | 2.99               | 13.98        |
| <i>Nupr1</i>     | Nuclear protein transcription regulator 1                                                          | 1.44               | 12.23        |
| <i>Angptl6</i>   | Angiopietin-like 6                                                                                 | 2.13               | 12.16        |
| <i>Samd5</i>     | Sterile alpha motif domain containing 5                                                            | 2.49               | 11.82        |
| <i>Soat2</i>     | Sterol O-acyltransferase 2                                                                         | 2.62               | 11.70        |
| <i>Aldh1l2</i>   | Aldehyde dehydrogenase 1 family, member L2                                                         | 1.71               | 11.70        |
| <i>Gabrp</i>     | Gamma-aminobutyric acid (GABA) A receptor, pi                                                      | 2.62               | 11.40        |
| <i>Slc7a11</i>   | Solute carrier family 7 (cationic amino acid transporter, y+ system), member 11                    | 2.36               | 11.40        |
| <i>Lgals3</i>    | Lectin, galactose binding, soluble 3                                                               | 1.34               | 11.16        |
| <i>Slc7a3</i>    | Solute carrier family 7 (cationic amino acid transporter, y+ system), member 3                     | 2.44               | 10.98        |
| <i>Wnt10a</i>    | Wingless-type MMTV integration site family, member 10A                                             | 2.58               | 10.07        |
| <i>Mt2</i>       | Metallothionein 2                                                                                  | 1.55               | 10.03        |
| <i>Pappa</i>     | Pregnancy-associated plasma protein A                                                              | 1.81               | 9.98         |
| <i>Slc38a1</i>   | Solute carrier family 38, member 1                                                                 | 1.31               | 9.58         |
| <i>Serpina10</i> | Serine (or cysteine) peptidase inhibitor, clade A (alpha-1 antiproteinase, antitrypsin), member 10 | 2.02               | 9.52         |
| <i>Egf</i>       | Epidermal growth factor                                                                            | -1.89              | 36.25        |
| <i>Umod</i>      | Uromodulin                                                                                         | -1.63              | 21.44        |
| <i>Azgp1</i>     | Alpha-2-glycoprotein 1, zinc                                                                       | -1.83              | 11.19        |
| <i>Car3</i>      | Carbonic anhydrase 3                                                                               | -1.80              | 11.16        |
| <i>Kcnt1</i>     | Potassium channel, subfamily T, member 1                                                           | -1.93              | 10.25        |
| <i>Gm36797</i>   | Predicted gene, 36797                                                                              | -2.32              | 9.74         |
| <i>Gm34472</i>   | Predicted gene, 34472                                                                              | -1.21              | 8.77         |
| <i>Gm34861</i>   | Predicted gene, 34861                                                                              | -1.54              | 8.63         |
| <i>Cyp2a4</i>    | Cytochrome P450, family 2, subfamily a, polypeptide 4                                              | -1.14              | 7.88         |
| <i>Tc2n</i>      | Tandem C2 domains, nuclear                                                                         | -1.37              | 7.77         |
| <i>Agps</i>      | Alkylglycerone phosphate synthase                                                                  | -1.01              | 7.08         |
| <i>Ksr2</i>      | Kinase suppressor of ras 2                                                                         | -1.10              | 7.05         |
| <i>Wfdc15b</i>   | WAP four-disulfide core domain 15B                                                                 | -1.18              | 7.01         |
| <i>Gm32960</i>   | Predicted gene, 32960                                                                              | -1.30              | 6.72         |
| <i>Trpm6</i>     | Transient receptor potential cation channel, subfamily M, member 6                                 | -1.26              | 6.64         |
| <i>Atp8b4</i>    | ATPase, class I, type 8B, member 4                                                                 | -1.58              | 5.95         |
| <i>Syn3</i>      | Synapsin III                                                                                       | -1.33              | 5.87         |
| <i>Col19a1</i>   | Collagen, type XIX, alpha 1                                                                        | -1.60              | 5.79         |
| <i>Idi1</i>      | Isopentenyl-diphosphate delta isomerase                                                            | -1.21              | 5.77         |
| <i>Slco1a1</i>   | Solute carrier organic anion transporter family, member 1a1                                        | -1.63              | 5.67         |
| <i>Ubiad1</i>    | UbiA prenyltransferase domain containing 1                                                         | -1.26              | 5.31         |
| <i>Dusp15</i>    | Dual specificity phosphatase-like 15                                                               | -1.33              | 5.23         |
| <i>Gm38481</i>   | Predicted gene, 38481                                                                              | -1.22              | 4.87         |
| <i>Gm7537</i>    | Predicted gene 7537                                                                                | -1.27              | 4.81         |
| <i>Perm1</i>     | PPARGC1 and ESRR induced regulator, muscle 1                                                       | -1.43              | 4.80         |

FDR: False discovery rate-adjusted *P* value (Benjamini-Hochberg correction).

**Appendix Table S12: Top 50 DEGs in *Umod*<sup>R186S/+</sup> compared to *Umod*<sup>C171Y/+</sup> at 4 months.**

| Symbol          | Gene name                                                                                         | Fold change (log2) | FDR (-log10) |
|-----------------|---------------------------------------------------------------------------------------------------|--------------------|--------------|
| <i>Lcn2</i>     | Lipocalin 2                                                                                       | 4.73               | 132.87       |
| <i>Akr1b8</i>   | Aldo-keto reductase family 1, member B8                                                           | 3.95               | 70.59        |
| <i>Arhgap36</i> | Rho GTPase activating protein 36                                                                  | 5.99               | 65.97        |
| <i>Slc7a11</i>  | Solute carrier family 7 (cationic amino acid transporter, y+ system), member 11                   | 4.76               | 51.56        |
| <i>Dpt</i>      | Dermatopontin                                                                                     | 2.99               | 49.40        |
| <i>Nefl</i>     | Neurofilament, light polypeptide                                                                  | 3.41               | 42.31        |
| <i>Trib3</i>    | Tribbles pseudokinase 3                                                                           | 4.00               | 37.82        |
| <i>Cbr3</i>     | Carbonyl reductase 3                                                                              | 3.34               | 35.67        |
| <i>Atf5</i>     | Activating transcription factor 5                                                                 | 2.10               | 35.22        |
| <i>Ppp2r2c</i>  | Protein phosphatase 2, regulatory subunit B, gamma                                                | 4.32               | 35.17        |
| <i>B4galnt2</i> | Beta-1,4-N-acetyl-galactosaminyl transferase 2                                                    | 3.62               | 30.75        |
| <i>Asns</i>     | Asparagine synthetase                                                                             | 2.21               | 30.44        |
| <i>Gabrp</i>    | Gamma-aminobutyric acid (GABA) A receptor, pi                                                     | 4.00               | 29.49        |
| <i>Aldh18a1</i> | Aldehyde dehydrogenase 18 family, member A1                                                       | 2.32               | 25.09        |
| <i>Gsta4</i>    | Glutathione S-transferase, alpha 4                                                                | 1.57               | 22.20        |
| <i>Stc2</i>     | Stanniocalcin 2                                                                                   | 2.40               | 20.49        |
| <i>Kif1a</i>    | Kinesin family member 1A                                                                          | 2.88               | 20.41        |
| <i>Gm32857</i>  | Predicted gene, 32857                                                                             | 3.64               | 20.41        |
| <i>Col18a1</i>  | Collagen, type XVIII, alpha 1                                                                     | 1.05               | 20.29        |
| <i>Abcc3</i>    | ATP-binding cassette, sub-family C (CFTR/MRP), member 3                                           | 2.05               | 19.39        |
| <i>Astn2</i>    | Astroctactin 2                                                                                    | 2.08               | 19.23        |
| <i>Slc38a1</i>  | Solute carrier family 38, member 1                                                                | 1.78               | 19.08        |
| <i>Mthfd2</i>   | Methylenetetrahydrofolate dehydrogenase (NAD+ dependent), methenyltetrahydrofolate cyclohydrolase | 1.89               | 19.08        |
| <i>Eda2r</i>    | Ectodysplasin A2 receptor                                                                         | 2.53               | 18.69        |
| <i>Ugt2b35</i>  | UDP glucuronosyltransferase 2 family, polypeptide B35                                             | 3.39               | 18.43        |
| <i>Egf</i>      | Epidermal growth factor                                                                           | -3.06              | 99.15        |
| <i>Gpx6</i>     | Glutathione peroxidase 6                                                                          | -2.50              | 55.12        |
| <i>Kcnt1</i>    | Potassium channel, subfamily T, member 1                                                          | -3.94              | 43.24        |
| <i>Umod</i>     | Uromodulin                                                                                        | -2.09              | 36.46        |
| <i>Jun</i>      | Jun proto-oncogene                                                                                | -3.19              | 30.59        |
| <i>Zfp36</i>    | Zinc finger protein 36                                                                            | -2.62              | 27.09        |
| <i>Btg2</i>     | BTG anti-proliferation factor 2                                                                   | -2.90              | 26.64        |
| <i>Tmem207</i>  | Transmembrane protein 207                                                                         | -2.71              | 22.26        |
| <i>Ckb</i>      | Creatine kinase, brain                                                                            | -1.84              | 22.20        |
| <i>Ier2</i>     | Immediate early response 2                                                                        | -2.95              | 20.44        |
| <i>Wfdc15b</i>  | WAP four-disulfide core domain 15B                                                                | -1.90              | 20.41        |
| <i>Nr4a1</i>    | Nuclear receptor subfamily 4, group A, member 1                                                   | -3.63              | 19.45        |
| <i>Pex5l</i>    | Peroxisomal biogenesis factor 5-like                                                              | -2.83              | 19.25        |
| <i>Fos</i>      | FBJ osteosarcoma oncogene                                                                         | -3.41              | 17.78        |
| <i>Ccn1</i>     | Cellular communication network factor 1                                                           | -3.15              | 17.74        |
| <i>Ppp1r1a</i>  | Protein phosphatase 1, regulatory inhibitor subunit 1A                                            | -1.27              | 17.43        |
| <i>Snord14e</i> | Small nucleolar RNA, C/D box 14E                                                                  | -2.76              | 17.17        |
| <i>Dusp15</i>   | Dual specificity phosphatase-like 15                                                              | -2.35              | 17.14        |
| <i>Csmp1</i>    | Cysteine-serine-rich nuclear protein 1                                                            | -2.46              | 17.07        |
| <i>Ier3</i>     | Immediate early response 3                                                                        | -2.28              | 16.10        |
| <i>Gm36797</i>  | Predicted gene, 36797                                                                             | -2.79              | 15.52        |
| <i>Nr4a2</i>    | Nuclear receptor subfamily 4, group A, member 2                                                   | -2.96              | 14.57        |
| <i>Tob1</i>     | Transducer of ErbB-2.1                                                                            | -1.65              | 14.36        |
| <i>Ccn2</i>     | Cellular communication network factor 2                                                           | -1.62              | 14.05        |
| <i>Gm17971</i>  | Predicted gene, 17971                                                                             | -2.05              | 14.02        |

FDR: False discovery rate-adjusted *P* value (Benjamini-Hochberg correction).

**Appendix Table S13: List of primary antibodies.**

| Target Antigen                          | Host species | Dilution   | Cat #    | Registry ID | Source                    |
|-----------------------------------------|--------------|------------|----------|-------------|---------------------------|
| Uromodulin                              | Sheep        | IF 1:300   | K90071C  | AB_153128   | Meridian Life Science     |
|                                         |              | WB 1:500   |          |             |                           |
| GRP78                                   | Rabbit       | IF 1:300   | ab21685  | AB_2119834  | Abcam                     |
|                                         |              | WB 1:1000  |          |             |                           |
| $\beta$ -Actin                          | Mouse        | WB 1:10000 | A5441    | AB_476744   | Sigma-Aldrich             |
| Calnexin                                | Rabbit       | IF 1:300   | C4731    | AB_476845   | Sigma-Aldrich             |
| CD3                                     | Rabbit       | IF 1:300   | ab16669  | AB_443425   | Abcam                     |
| PERK                                    | Rabbit       | WB 1:500   | 3192     | AB_2095847  | Cell Signaling Technology |
| IRE1 (phospho Ser724)                   | Rabbit       | WB 1:500   | ab48187  | AB_873899   | Abcam                     |
| IRE1- $\alpha$                          | Rabbit       | WB 1:500   | 3294     | AB_823545   | Cell Signaling Technology |
| ATF4                                    | Rabbit       | WB 1:500   | ab105383 | AB_10861973 | Abcam                     |
| eIF2 $\alpha$ (phospho Ser51)           | Rabbit       | WB 1:250   | 3398     | AB_2096481  | Cell Signaling Technology |
| eIF2 $\alpha$                           | Rabbit       | WB 1:500   | 5324     | AB_10692650 | Cell Signaling Technology |
| Lipocalin 2                             | Rabbit       | IF 1:300   | ab63929  | AB_1140965  | Abcam                     |
|                                         | Goat         | WB 1:500   | AF1857   | AB_355022   | R and D Systems           |
| Cleaved Caspase-3                       | Rabbit       | WB 1:250   | 9661     | AB_2341188  | Cell Signaling Technology |
| Caspase-3                               | Rabbit       | WB 1:1000  | 9662     | AB_331439   | Cell Signaling Technology |
| SQSTM1/p62                              | Mouse        | WB 1:1000  | ab56416  | AB_945626   | Abcam                     |
|                                         | Rabbit       | IF 1:200   | ab109012 | AB_2810880  | Abcam                     |
| S6 Ribosomal Protein (phospho S235/236) | Rabbit       | WB 1:500   | 4858     | AB_916156   | Cell Signaling Technology |
| S6 Ribosomal Protein                    | Rabbit       | WB 1:500   | 2217     | AB_331355   | Cell Signaling Technology |
| LC3                                     | Rabbit       | IF 1:300   | PM036    | AB_2274121  | MBL International         |
|                                         |              | WB 1:500   |          |             |                           |
| GFP                                     | Goat         | WB 1:1000  | AB0020   | AB_2333100  | SICGEN                    |
| Ubiquitin                               | Mouse        | WB 1:1000  | sc-8017  | AB_628423   | Santa Cruz Biotechnology  |
| F4/80                                   | Rabbit       | IF 1:300   | 70076    | AB_2799771  | Cell Signaling Technology |
| LAMP1                                   | Rat          | IF 1:300   | sc-19992 | AB_2134495  | Santa Cruz Biotechnology  |
| ATG5                                    | Rabbit       | IF 1:300   | ab108327 | AB_2650499  | Abcam                     |

**Appendix Table S14: Primers used for real-time RT-PCR analysis.**

| Gene product    | Forward primer (5'-3')     | Reverse primer (5'-3')         | PCR Product (bp) | Efficiency  |
|-----------------|----------------------------|--------------------------------|------------------|-------------|
| <i>18S</i>      | GTA ACC CGT TGA ACC CCA TT | CCA TCC AAT CGG TAG TAG CG     | 151              | 0.98 ± 0.02 |
| <i>36B4</i>     | CTT CAT TGT GGG AGC AGA CA | TTC TCC AGA GCT GGG TTG TT     | 150              | 1.02 ± 0.02 |
| <i>Acox1</i>    | CTG GTG GGT GGT ATG GTG TC | GTG ACT CAC TTG GGC CTG AA     | 186              | 1.03 ± 0.03 |
| <i>Acox2</i>    | AAG CCT CAT CCA ACG TGA CC | AAT GCG TTC AGG ACC GTC TT     | 151              | 0.99 ± 0.02 |
| <i>Acox3</i>    | CAT GTA CGA CTG GTC CCT GG | CCC ATG ACT CAG TTC GGT GA     | 160              | 1.02 ± 0.03 |
| <i>Acta2</i>    | TGT GCT GGA CTC TGG AGA TG | GAA GGA ATA GCC ACG CTC AG     | 148              | 1.03 ± 0.02 |
| <i>Actg1</i>    | TGC CCA TCT ATG AGG GCT AC | CCC GTT CAG TCA GGA TCT TC     | 102              | 1.03 ± 0.04 |
| <i>Adgre1</i>   | CCA GGA GTG GCT TTT GTC TC | GGC TTG GAG AAG TCC TCC TT     | 152              | 0.97 ± 0.03 |
| <i>Atf3</i>     | CCA GGT CTC TGC CTC AGA AG | CCG ATG GCA GAG GTG TTT AT     | 151              | 0.98 ± 0.03 |
| <i>Atf4</i>     | CAT GCC AGA TGA GCT CTT GA | GGC AAC CTG GTC GAC TTT TA     | 145              | 0.96 ± 0.03 |
| <i>Ccnd1</i>    | AGC AGA AGT GCG AAG AGG AG | CAA GGG AAT GGT CTC CTT CA     | 149              | 0.98 ± 0.03 |
| <i>Cd68</i>     | CCA ACA AAA CCA AGG TCC AG | ATT GTA TTC CAC CGC CAT GT     | 152              | 1.03 ± 0.03 |
| <i>Coll1a1</i>  | GAT CTC CTG GTG CTG ATG GA | GAC CTT GTT TGC CAG GTT CA     | 156              | 0.98 ± 0.03 |
| <i>Col3a1</i>   | TCC TGG TGG TCC TGG TAC T  | TTG CCA GGA GAA CCA CTG TT     | 154              | 0.96 ± 0.04 |
| <i>Cpt1a</i>    | TGG CAG TCG ACT CAC CTT TC | ACA CCA TAG CCG TCA TCA GC     | 166              | 0.98 ± 0.02 |
| <i>Cpt2</i>     | TTG ACG CCA TTC AGT TTC AG | GCA GTG CTG CAG GAT TCA TA     | 148              | 1.02 ± 0.03 |
| <i>Cryab</i>    | ACT TCC CTG AGC CCC TTC TA | CTT GCC GTG GAC CTC AAT CA     | 186              | 0.98 ± 0.02 |
| <i>Dnaja4</i>   | TGA AGG CAT CGG TGG GAA AA | AGT TCT CAC AGC GGT CCT TG     | 176              | 1.02 ± 0.03 |
| <i>Dnajb4</i>   | GAC CCT CCC GTC TCA AAC AA | TGA TTT TGG TGC CTT CTT TCC AC | 195              | 1.01 ± 0.02 |
| <i>Ddit3</i>    | CCA GGA GGA AGA GGA GGA AG | CCG CTC GTT CTC TTC AGC TA     | 148              | 1.02 ± 0.03 |
| <i>Eif2a</i>    | ATT ATC ACC ATC CCC GCC AC | GCA GGC ACA GAC AGT CTC AT     | 166              | 0.97 ± 0.04 |
| <i>Eif2ak3</i>  | GAC TGC GGA GAC AAC AGT GA | GGA CGT TCC TTC CCT AGA CC     | 173              | 0.99 ± 0.02 |
| <i>Fn1</i>      | GCA AGC CAG TTT CCA TCA AT | CAT TTT TGG GAG TGG TGG TC     | 150              | 0.98 ± 0.02 |
| <i>Gapdh</i>    | TGC ACC ACC AAC TGC TTA GC | GGA TGC AGG GAT GGG GGA GA     | 176              | 1.04 ± 0.03 |
| <i>Hprt1</i>    | ACA TTG TGG CCC TCT GTG TG | TTA TGT CCC CCG TTG ACT GA     | 162              | 0.99 ± 0.01 |
| <i>Hsp90aa1</i> | CCC GTG AAA TGC TGC AAC AA | GTA CCG CAA CAG CTC TGA AAG    | 200              | 0.98 ± 0.03 |
| <i>Hsp90ab1</i> | GAC CTG CCC CTG AAC ATC TC | GGC GTC GGT TAG TGG AAT CT     | 196              | 1.04 ± 0.02 |
| <i>Hspa5</i>    | CAC TGT GGT ACC CAC CAA GA | GCA GGA GGA ATT CCA GTC AG     | 149              | 1.01 ± 0.02 |
| <i>Lcn2</i>     | ATG TCA CCT CCA TCC TGG TC | GTG GCC ACT TGC ACA TTG TA     | 148              | 0.97 ± 0.03 |
| <i>Lgals3</i>   | GCC TAC CCC AGT GCT CCT    | TTG CGT TGG GTT TCA CTG TG     | 151              | 0.98 ± 0.02 |
| <i>Mki67</i>    | TGC AAA GGT AGA GGC TCC AT | CAG GTA GGC CAG AGC AAG T      | 152              | 0.98 ± 0.03 |
| <i>Nupr1</i>    | ACC CTT CCC AGC AAC CTC TA | TGG AAC TTG GTC AGC AGC TT     | 187              | 0.97 ± 0.02 |
| <i>Pena</i>     | TTG GAA TCC CAG AAC AGG AG | ATT GCC AAG CTC TCC ACT TG     | 155              | 1.04 ± 0.03 |
| <i>Ppia</i>     | CGT CTC CTT CGA GCT GTT TG | CCA CCC TGG CAC ATG AAT C      | 139              | 1.02 ± 0.02 |
| <i>Ptprc</i>    | GGA GAC CAG GAA GTC TGT GC | GTT CTG GGC TCC TTC CTC TT     | 145              | 0.97 ± 0.03 |
| <i>Retreg1</i>  | ACT TGA CCA GGC AGA GCT AG | TTT ATC TGT GCT TCG CTG GC     | 160              | 1.01 ± 0.02 |
| <i>Rtn3</i>     | AGA GTG TGC TTT CCC CTC TC | TCC TCC TCC ACA GAC TGA GA     | 187              | 0.99 ± 0.01 |
| <i>Sec61a1</i>  | CGT TGG TGG CCT GTG TTA CT | CAC CAT CTG CTG CTC CTT CA     | 190              | 1.02 ± 0.03 |
| <i>Sec62</i>    | TCT GGC CAG CAG AAA TGA GA | CAG TCA GGT TTG GCA GGA AC     | 164              | 0.97 ± 0.02 |
| <i>Slc12a1</i>  | ATT GGC CTG AGC GTA GTT GT | AGC AAA GAT CAA GCC TAT TGA CC | 150              | 1.01 ± 0.03 |
| <i>Sqstm1</i>   | CCC CAA TGT GAT CTG TGA TG | AAG GGG TTG GGA AAG ATG AG     | 127              | 0.99 ± 0.03 |
| <i>Tgfb1</i>    | GTG GAA ATC AAC GGG ATC AG | GTT GGT ATC CAG GGC TCT C      | 150              | 0.96 ± 0.03 |
| <i>Thr4</i>     | GTG GCC CTA CCA AGT CTC AG | GAC CCA TGA AAT TGG CAC TC     | 154              | 1.01 ± 0.02 |
| <i>Umod</i>     | TCA GCC TGA AGA CCT CCC TA | GAA AAG CCT CAG TGG ACA GC     | 156              | 0.99 ± 0.02 |
| <i>Xbp1s</i>    | GCC ATT GTC TGA GAC CAC CT | AGC TGG GGG AAA AGT TCA TT     | 151              | 0.98 ± 0.04 |

**Appendix Table S15: RNA-Seq quality and yield.**

| <b>Sample</b> | <b>Genotype (<i>Umod</i>)</b> | <b>Age (months)</b> | <b>Yeld (Mbp)</b> | <b>%Q30</b> | <b>Mean Q</b> |
|---------------|-------------------------------|---------------------|-------------------|-------------|---------------|
| WT_1.1        | +/+                           | 1                   | 4'802             | 91.63       | 34.75         |
| WT_1.2        | +/+                           | 1                   | 6'401             | 90.87       | 34.47         |
| WT_1.3        | +/+                           | 1                   | 5'373             | 93.09       | 35.16         |
| C171Y_1.1     | C171Y/+                       | 1                   | 5'937             | 91.76       | 34.82         |
| C171Y_1.2     | C171Y/+                       | 1                   | 6'435             | 95.13       | 35.73         |
| C171Y_1.3     | C171Y/+                       | 1                   | 5'301             | 91.87       | 34.83         |
| R186S_1.1     | R186S/+                       | 1                   | 5'132             | 92.7        | 35.07         |
| R186S_1.2     | R186S/+                       | 1                   | 4'891             | 92.81       | 35.07         |
| R186S_1.3     | R186S/+                       | 1                   | 5'212             | 89.28       | 34.22         |
| WT_4.1        | +/+                           | 4                   | 6'592             | 90.15       | 34.45         |
| WT_4.2        | +/+                           | 4                   | 7'648             | 91.63       | 34.75         |
| WT_4.3        | +/+                           | 4                   | 8'959             | 93.77       | 35.42         |
| C171Y_4.1     | C171Y/+                       | 4                   | 6'932             | 92.41       | 35.01         |
| C171Y_4.2     | C171Y/+                       | 4                   | 9'851             | 93.28       | 35.36         |
| C171Y_4.3     | C171Y/+                       | 4                   | 7'213             | 92.23       | 34.97         |
| R186S_4.1     | R186S/+                       | 4                   | 6'392             | 91.81       | 34.79         |
| R186S_4.2     | R186S/+                       | 4                   | 6'809             | 91.74       | 34.72         |
| R186S_4.3     | R186S/+                       | 4                   | 5'311             | 91.77       | 34.98         |

All reads have passed the Illumina chastity filter. %Q30, percentage of bases with quality score  $\geq 30$ ; Mean Q, prediction of the probability of a wrong base call.



## Appendix References

Dahan K, Devuyst O, Smaers M, Vertommen D, Loute G, Poux JM, Viron B, Jacquot C, Gagnadoux MF, Chauveau D *et al* (2003) A cluster of mutations in the UMOD gene causes familial juvenile hyperuricemic nephropathy with abnormal expression of uromodulin. *J Am Soc Nephrol* 14(11):2883-93.

Ioannidis NM, Rothstein JH, Pejaver V, Middha S, McDonnell SK, Baheti S, Musolf A, Li Q, Holzinger E, Karyadi D *et al* (2016) REVEL: An Ensemble Method for Predicting the Pathogenicity of Rare Missense Variants. *Am J Hum Genet* 99(4):877-85.

Karczewski KJ, Francioli LC, Tiao G, Cummings BB, Alföldi J, Wang Q, Collins RL, Laricchia KM, Ganna A, Birnbaum DP *et al* (2020) The mutational constraint spectrum quantified from variation in 141,456 humans. *Nature* 581(7809):434-43.

Kopanos C, Tsiolkas V, Kouris A, Chapple CE, Albarca Aguilera M, Meyer R, Massouras A (2019) VarSome: the human genomic variant search engine. *Bioinformatics* 35(11):1978-80.

Turro E, Astle WJ, Megy K, Gräf S, Greene D, Shamardina O, Allen HL, Sanchis-Juan A, Frontini M, Thys C *et al* (2020) Whole-genome sequencing of patients with rare diseases in a national health system. *Nature* 583(7814):96-102.

Van Hout CV, Tachmazidou I, Backman JD, Hoffman JD, Liu D, Pandey AK, Gonzaga-Jauregui C, Khalid S, Ye B, Banerjee N *et al* (2020) Exome sequencing and characterization of 49,960 individuals in the UK Biobank. *Nature* 586(7831):749-56.
